# Supplementary material for: Analysis of the Plastid Genome Sequence During Maize Seedling Development
Source: Front Genet. 2022 Apr 26;13:870115. doi: 10.3389/fgene.2022.870115 (PMC9086435; doi:10.3389/fgene.2022.870115)
Supplement: Supplementary file 2 [file DataSheet2.XLSX]

## Sheet: Info
Supplementary material 2
Title: Analysis of the plastid genome sequence during maize seedling development
Running title: Plastome genomics in developing maize plants
Authors: Diwaker Tripathi, Delene J. Oldenburg, and Arnold J. Bendich*
Affiliation: Department of Biology, University of Washington, Seattle, WA, United States
Arnold Bendich
(bendich@uw.edu)

## Sheet: Leaves_light #1
VCF Metadata of sample #1 - Leaves_light #1
##fileformat=VCFv4.2
##FORMAT=<ID=AD,Number=R,Type=Integer,Description="Allelic depths (counting only informative reads out of the total reads) for the ref and alt alleles in the order listed">
##FORMAT=<ID=AF,Number=A,Type=Float,Description="Allele fractions for alt alleles in the order listed">
##FORMAT=<ID=DP,Number=1,Type=Integer,Description="Approximate read depth (reads with MQ=255 or with bad mates are filtered)">
##FORMAT=<ID=F1R2,Number=R,Type=Integer,Description="Count of reads in F1R2 pair orientation supporting each allele">
##FORMAT=<ID=F2R1,Number=R,Type=Integer,Description="Count of reads in F2R1 pair orientation supporting each allele">
##FORMAT=<ID=GP,Number=G,Type=Float,Description="Phred-scaled posterior probabilities for genotypes as defined in the VCF specification">
##FORMAT=<ID=GQ,Number=1,Type=Integer,Description="Genotype Quality">
##FORMAT=<ID=GT,Number=1,Type=String,Description="Genotype">
##FORMAT=<ID=MB,Number=4,Type=Integer,Description="Per-sample component statistics to detect mate bias">
##FORMAT=<ID=PL,Number=G,Type=Integer,Description="Normalized, Phred-scaled likelihoods for genotypes as defined in the VCF specification">
##FORMAT=<ID=PRI,Number=G,Type=Float,Description="Phred-scaled prior probabilities for genotypes">
##FORMAT=<ID=PS,Number=1,Type=Integer,Description="Physical phasing ID information, where each unique ID within a given sample (but not across samples) connects records within a phasing group">
##FORMAT=<ID=SB,Number=4,Type=Integer,Description="Per-sample component statistics which comprise the Fisher's Exact Test to detect strand bias">
##DRAGENCommandLine=<ID=HashTableBuild,Version="SW: 01.003.044.3.8.4, HashTableVersion: 8",CommandLineOptions="/opt/edico/bin/dragen --lic-instance-id-location /root/.edico --build-hash-table true --ht-reference /data/input/appresults/156901751/Ref_Zm Cp_KF241981.fasta --ht-alt-aware-validate true --output-directory /data/scratch/Ref_Zm_Cp_KF241981">
##DRAGENCommandLine=<ID=dragen,Version="SW: 05.021.602.3.8.4, HW: 05.021.602",Date="Tue Jun 22 18:54:32 UTC 2021",CommandLineOptions="--lic-server https://XXXXXXXXXXXX:YYYYYYYYYYYYYYYYYYYYYYYYYYYYYYYY@license.edicogenome.com --lic-instance-id-location /root/.edico --output_status_file /data/scratch/progress.log --enable-duplicate-marking true --enable-map-align true --enable-map-align-output true…
##INFO=<ID=AC,Number=A,Type=Integer,Description="Allele count in genotypes, for each ALT allele, in the same order as listed">
##INFO=<ID=AF,Number=A,Type=Float,Description="Allele Frequency, for each ALT allele, in the same order as listed">
##INFO=<ID=AN,Number=1,Type=Integer,Description="Total number of alleles in called genotypes">
##INFO=<ID=DB,Number=0,Type=Flag,Description="dbSNP Membership">
##INFO=<ID=DP,Number=1,Type=Integer,Description="Approximate read depth (informative and non-informative); some reads may have been filtered based on mapq etc.">
##INFO=<ID=END,Number=1,Type=Integer,Description="Stop position of the interval">
##INFO=<ID=FS,Number=1,Type=Float,Description="Phred-scaled p-value using Fisher's exact test to detect strand bias">
##INFO=<ID=FractionInformativeReads,Number=1,Type=Float,Description="The fraction of informative reads out of the total reads">
##INFO=<ID=MQ,Number=1,Type=Float,Description="RMS Mapping Quality">
##INFO=<ID=MQRankSum,Number=1,Type=Float,Description="Z-score From Wilcoxon rank sum test of Alt vs. Ref read mapping qualities">
##INFO=<ID=QD,Number=1,Type=Float,Description="Variant Confidence/Quality by Depth">
##INFO=<ID=R2_5P_bias,Number=1,Type=Float,Description="Score based on mate bias and distance from 5 prime end">
##INFO=<ID=ReadPosRankSum,Number=1,Type=Float,Description="Z-score from Wilcoxon rank sum test of Alt vs. Ref read position bias">
##INFO=<ID=SOR,Number=1,Type=Float,Description="Symmetric Odds Ratio of 2x2 contingency table to detect strand bias">
##FILTER=<ID=DRAGENSnpHardQUAL,Description="Set if true:QUAL < 10.41">
##FILTER=<ID=DRAGENIndelHardQUAL,Description="Set if true:QUAL < 7.83">
##FILTER=<ID=LowDepth,Description="Set if true:DP <= 1">
##FILTER=<ID=LowGQ,Description="Set if true:GQ = 0">
##FILTER=<ID=PloidyConflict,Description="Genotype call from variant caller not consistent with chromosome ploidy">
##FILTER=<ID=RMxNRepeatRegion,Description="Site filtered because all or part of the variant allele is a repeat of the reference">
##contig=<ID=ENA|KF241981|KF241981.1,length=140447>
##reference=file:///data/scratch/Ref_Zm_Cp_KF241981.v8/254780843/reference.bin
#CHROM	POS	ID	REF	ALT	QUAL	FILTER	INFO	FORMAT	maize_302332
ENA|KF241981|KF241981.1	3242	.	GC	G	486.41	PASS	AC=2;AF=1.000;AN=2;DP=154;FS=0.000;MQ=246.00;QD=3.16;SOR=1.037;FractionInformativeReads=0.948	GT:AD:AF:DP:F1R2:F2R1:GQ:PL:GP:PRI:SB:MB	1/1:0,146:1.000:146:0,69:0,77:436:527,439,0:4.5000e+02,4.3649e+02,0.0000e+00:0.00,38.00,41.00:0,0,62,84:0,0,69,77
ENA|KF241981|KF241981.1	3754	.	T	TAA	391.1	PASS	AC=2;AF=1.000;AN=2;DP=138;FS=0.000;MQ=247.39;QD=2.83;SOR=0.877;FractionInformativeReads=0.841	GT:AD:AF:DP:F1R2:F2R1:GQ:PL:GP:PRI:SB:MB	1/1:0,116:1.000:116:0,61:0,55:341:401,344,0:3.9110e+02,3.4110e+02,0.0000e+00:0.00,7.00,10.00:0,0,53,63:0,0,58,58
ENA|KF241981|KF241981.1	12961	.	A	ATTTTTT	372.85	PASS	AC=2;AF=1.000;AN=2;DP=134;FS=0.000;MQ=240.92;MQRankSum=1.456;QD=2.78;ReadPosRankSum=1.487;SOR=0.411;FractionInformativeReads=0.843;R2_5P_bias=0.000	GT:AD:AF:DP:F1R2:F2R1:GQ:PL:GP:PRI:SB:MB	1/1:1,112:0.991:113:0,62:1,50:322:381,325,0:3.7218e+02,3.2218e+02,0.0000e+00:0.00,6.00,9.00:0,1,46,66:1,0,64,48
ENA|KF241981|KF241981.1	17176	.	AG	A	15.44	PASS	AC=1;AF=0.500;AN=2;DP=121;FS=1.877;MQ=247.75;MQRankSum=7.742;QD=0.13;ReadPosRankSum=0.427;SOR=0.444;FractionInformativeReads=0.884;R2_5P_bias=21.336	GT:AD:AF:DP:F1R2:F2R1:GQ:PL:GP:PRI:SB:MB	0/1:80,27:0.252:107:40,16:40,11:15:21,0,50:1.5435e+01,1.2607e-01,5.3126e+01:0.00,6.00,9.00:30,50,12,15:34,46,13,14
ENA|KF241981|KF241981.1	93110	.	T	TG	16.27	LowDepth	AC=2;AF=1.000;AN=2;DP=1;FS=0.000;MQ=14.00;QD=16.27;SOR=1.609;FractionInformativeReads=1.000	GT:AD:AF:DP:F1R2:F2R1:GQ:PL:GP:PRI:SB:MB	1/1:0,1:1.000:1:0,0:0,1:3:41,3,0:1.6273e+01,3.1190e+00,3.1090e+00:0.00,25.00,28.00:0,0,1,0:0,0,0,1
ENA|KF241981|KF241981.1	102464	.	A	C	8.65	DRAGENSnpHardQUAL;LowDepth	AC=2;AF=1.000;AN=2;DP=1;FS=0.000;MQ=5.00;QD=8.65;SOR=1.609;FractionInformativeReads=1.000	GT:AD:AF:DP:F1R2:F2R1:GQ:PL:GP:PRI:SB:MB	1/1:0,1:1.000:1:0,1:0,0:2:43,3,0:8.6522e+00,3.6522e+00,3.6420e+00:0.00,34.77,37.77:0,0,0,1:0,0,0,1
ENA|KF241981|KF241981.1	125424	.	T	G	6.08	DRAGENSnpHardQUAL	AC=1;AF=0.500;AN=2;DP=2;FS=0.000;MQ=5.00;MQRankSum=0.804;QD=3.04;ReadPosRankSum=0.804;SOR=0.693;FractionInformativeReads=1.000;R2_5P_bias=-8.044	GT:AD:AF:DP:F1R2:F2R1:GQ:PL:GP:PRI:SB:MB	0/1:1,1:0.500:2:0,1:1,0:5:39,0,5:6.0789e+00,1.8691e+00,9.8691e+00:0.00,34.77,37.77:1,0,1,0:0,1,1,0
ENA|KF241981|KF241981.1	125509	.	T	G	7.78	DRAGENSnpHardQUAL;LowDepth	AC=2;AF=1.000;AN=2;DP=1;FS=0.000;MQ=5.00;QD=7.78;SOR=1.609;FractionInformativeReads=1.000	GT:AD:AF:DP:F1R2:F2R1:GQ:PL:GP:PRI:SB:MB	1/1:0,1:1.000:1:0,0:0,1:2:42,3,0:7.7752e+00,3.8084e+00,3.7984e+00:0.00,34.77,37.77:0,0,1,0:0,0,0,1

## Sheet: Leaves_light #2
VCF Metadata of sample #2 - Leaves_light #2
##fileformat=VCFv4.2
##FORMAT=<ID=AD,Number=R,Type=Integer,Description="Allelic depths (counting only informative reads out of the total reads) for the ref and alt alleles in the order listed">
##FORMAT=<ID=AF,Number=A,Type=Float,Description="Allele fractions for alt alleles in the order listed">
##FORMAT=<ID=DP,Number=1,Type=Integer,Description="Approximate read depth (reads with MQ=255 or with bad mates are filtered)">
##FORMAT=<ID=F1R2,Number=R,Type=Integer,Description="Count of reads in F1R2 pair orientation supporting each allele">
##FORMAT=<ID=F2R1,Number=R,Type=Integer,Description="Count of reads in F2R1 pair orientation supporting each allele">
##FORMAT=<ID=GP,Number=G,Type=Float,Description="Phred-scaled posterior probabilities for genotypes as defined in the VCF specification">
##FORMAT=<ID=GQ,Number=1,Type=Integer,Description="Genotype Quality">
##FORMAT=<ID=GT,Number=1,Type=String,Description="Genotype">
##FORMAT=<ID=MB,Number=4,Type=Integer,Description="Per-sample component statistics to detect mate bias">
##FORMAT=<ID=PL,Number=G,Type=Integer,Description="Normalized, Phred-scaled likelihoods for genotypes as defined in the VCF specification">
##FORMAT=<ID=PRI,Number=G,Type=Float,Description="Phred-scaled prior probabilities for genotypes">
##FORMAT=<ID=PS,Number=1,Type=Integer,Description="Physical phasing ID information, where each unique ID within a given sample (but not across samples) connects records within a phasing group">
##FORMAT=<ID=SB,Number=4,Type=Integer,Description="Per-sample component statistics which comprise the Fisher's Exact Test to detect strand bias">
##DRAGENCommandLine=<ID=HashTableBuild,Version="SW: 01.003.044.3.8.4, HashTableVersion: 8",CommandLineOptions="/opt/edico/bin/dragen --lic-instance-id-location /root/.edico --build-hash-table true --ht-reference /data/input/appresults/156901751/Ref_Zm Cp_KF241981.fasta --ht-alt-aware-validate true --output-directory /data/scratch/Ref_Zm_Cp_KF241981">
##DRAGENCommandLine=<ID=dragen,Version="SW: 05.021.602.3.8.4, HW: 05.021.602",Date="Tue Jun 22 22:00:02 UTC 2021",CommandLineOptions="--lic-server https://XXXXXXXXXXXX:YYYYYYYYYYYYYYYYYYYYYYYYYYYYYYYY@license.edicogenome.com --lic-instance-id-location /root/.edico --output_status_file /data/scratch/progress.log --enable-duplicate-marking true --enable-map-align true --enable-map-align-output true…
##INFO=<ID=AC,Number=A,Type=Integer,Description="Allele count in genotypes, for each ALT allele, in the same order as listed">
##INFO=<ID=AF,Number=A,Type=Float,Description="Allele Frequency, for each ALT allele, in the same order as listed">
##INFO=<ID=AN,Number=1,Type=Integer,Description="Total number of alleles in called genotypes">
##INFO=<ID=DB,Number=0,Type=Flag,Description="dbSNP Membership">
##INFO=<ID=DP,Number=1,Type=Integer,Description="Approximate read depth (informative and non-informative); some reads may have been filtered based on mapq etc.">
##INFO=<ID=END,Number=1,Type=Integer,Description="Stop position of the interval">
##INFO=<ID=FS,Number=1,Type=Float,Description="Phred-scaled p-value using Fisher's exact test to detect strand bias">
##INFO=<ID=FractionInformativeReads,Number=1,Type=Float,Description="The fraction of informative reads out of the total reads">
##INFO=<ID=MQ,Number=1,Type=Float,Description="RMS Mapping Quality">
##INFO=<ID=MQRankSum,Number=1,Type=Float,Description="Z-score From Wilcoxon rank sum test of Alt vs. Ref read mapping qualities">
##INFO=<ID=QD,Number=1,Type=Float,Description="Variant Confidence/Quality by Depth">
##INFO=<ID=R2_5P_bias,Number=1,Type=Float,Description="Score based on mate bias and distance from 5 prime end">
##INFO=<ID=ReadPosRankSum,Number=1,Type=Float,Description="Z-score from Wilcoxon rank sum test of Alt vs. Ref read position bias">
##INFO=<ID=SOR,Number=1,Type=Float,Description="Symmetric Odds Ratio of 2x2 contingency table to detect strand bias">
##FILTER=<ID=DRAGENSnpHardQUAL,Description="Set if true:QUAL < 10.41">
##FILTER=<ID=DRAGENIndelHardQUAL,Description="Set if true:QUAL < 7.83">
##FILTER=<ID=LowDepth,Description="Set if true:DP <= 1">
##FILTER=<ID=LowGQ,Description="Set if true:GQ = 0">
##FILTER=<ID=PloidyConflict,Description="Genotype call from variant caller not consistent with chromosome ploidy">
##FILTER=<ID=RMxNRepeatRegion,Description="Site filtered because all or part of the variant allele is a repeat of the reference">
##contig=<ID=ENA|KF241981|KF241981.1,length=140447>
##reference=file:///data/scratch/Ref_Zm_Cp_KF241981.v8/254780843/reference.bin
#CHROM	POS	ID	REF	ALT	QUAL	FILTER	INFO	FORMAT	302333
ENA|KF241981|KF241981.1	3242	.	GC	G	449.79	PASS	AC=2;AF=1.000;AN=2;DP=157;FS=0.000;MQ=242.28;QD=2.86;SOR=1.153;FractionInformativeReads=0.854	GT:AD:AF:DP:F1R2:F2R1:GQ:PL:GP:PRI:SB:MB	1/1:0,134:1.000:134:0,69:0,65:400:491,403,0:4.4853e+02,3.9979e+02,0.0000e+00:0.00,38.00,41.00:0,0,54,80:0,0,55,79
ENA|KF241981|KF241981.1	3754	.	T	TAA	358.41	PASS	AC=2;AF=1.000;AN=2;DP=135;FS=0.000;MQ=245.14;QD=2.65;SOR=0.987;FractionInformativeReads=0.785	GT:AD:AF:DP:F1R2:F2R1:GQ:PL:GP:PRI:SB:MB	1/1:0,106:1.000:106:0,52:0,54:308:368,311,0:3.5841e+02,3.0841e+02,0.0000e+00:0.00,7.00,10.00:0,0,46,60:0,0,46,60
ENA|KF241981|KF241981.1	12961	.	A	ATTTTTT,ATTTTTTT	425.75	PASS	AC=1,1;AF=0.500,0.500;AN=2;DP=147;FS=0.000;MQ=239.78;MQRankSum=1.254;QD=2.90;ReadPosRankSum=1.583;SOR=0.441;FractionInformativeReads=0.789;R2_5P_bias=0.000	GT:AD:AF:DP:F1R2:F2R1:GQ:PL:GP:PRI:SB:MB	1/2:1,82,33:0.707,0.284:116:1,37,15:0,45,18:42:440,383,47,591,0,54:4.2575e+02,3.7575e+02,4.2932e+01,4.5000e+02,2.6456e-04,5.0000e+01:0.00,7.00,10.01,7.00,14.00,10.01:0,1,46,69:0,1,63,52
ENA|KF241981|KF241981.1	17176	.	AG	A	8.19	PASS	AC=1;AF=0.500;AN=2;DP=126;FS=6.883;MQ=241.14;MQRankSum=7.596;QD=0.07;ReadPosRankSum=0.710;SOR=1.519;FractionInformativeReads=0.817;R2_5P_bias=24.626	GT:AD:AF:DP:F1R2:F2R1:GQ:PL:GP:PRI:SB:MB	0/1:77,26:0.252:103:48,16:29,10:8:14,0,47:8.1938e+00,7.1389e-01,5.0714e+01:0.00,7.00,10.01:22,55,4,22:31,46,14,12

## Sheet: Leaves_dark #1
VCF Metadata of sample #3 - Leaves_dark #1
##fileformat=VCFv4.2
##FORMAT=<ID=AD,Number=R,Type=Integer,Description="Allelic depths (counting only informative reads out of the total reads) for the ref and alt alleles in the order listed">
##FORMAT=<ID=AF,Number=A,Type=Float,Description="Allele fractions for alt alleles in the order listed">
##FORMAT=<ID=DP,Number=1,Type=Integer,Description="Approximate read depth (reads with MQ=255 or with bad mates are filtered)">
##FORMAT=<ID=F1R2,Number=R,Type=Integer,Description="Count of reads in F1R2 pair orientation supporting each allele">
##FORMAT=<ID=F2R1,Number=R,Type=Integer,Description="Count of reads in F2R1 pair orientation supporting each allele">
##FORMAT=<ID=GP,Number=G,Type=Float,Description="Phred-scaled posterior probabilities for genotypes as defined in the VCF specification">
##FORMAT=<ID=GQ,Number=1,Type=Integer,Description="Genotype Quality">
##FORMAT=<ID=GT,Number=1,Type=String,Description="Genotype">
##FORMAT=<ID=MB,Number=4,Type=Integer,Description="Per-sample component statistics to detect mate bias">
##FORMAT=<ID=PL,Number=G,Type=Integer,Description="Normalized, Phred-scaled likelihoods for genotypes as defined in the VCF specification">
##FORMAT=<ID=PRI,Number=G,Type=Float,Description="Phred-scaled prior probabilities for genotypes">
##FORMAT=<ID=PS,Number=1,Type=Integer,Description="Physical phasing ID information, where each unique ID within a given sample (but not across samples) connects records within a phasing group">
##FORMAT=<ID=SB,Number=4,Type=Integer,Description="Per-sample component statistics which comprise the Fisher's Exact Test to detect strand bias">
##DRAGENCommandLine=<ID=HashTableBuild,Version="SW: 01.003.044.3.8.4, HashTableVersion: 8",CommandLineOptions="/opt/edico/bin/dragen --lic-instance-id-location /root/.edico --build-hash-table true --ht-reference /data/input/appresults/156901751/Ref_Zm Cp_KF241981.fasta --ht-alt-aware-validate true --output-directory /data/scratch/Ref_Zm_Cp_KF241981">
##DRAGENCommandLine=<ID=dragen,Version="SW: 05.021.602.3.8.4, HW: 05.021.602",Date="Tue Jun 22 23:43:58 UTC 2021",CommandLineOptions="--lic-server https://XXXXXXXXXXXX:YYYYYYYYYYYYYYYYYYYYYYYYYYYYYYYY@license.edicogenome.com --lic-instance-id-location /root/.edico --output_status_file /data/scratch/progress.log --enable-duplicate-marking true --enable-map-align true --enable-map-align-output true…
##INFO=<ID=AC,Number=A,Type=Integer,Description="Allele count in genotypes, for each ALT allele, in the same order as listed">
##INFO=<ID=AF,Number=A,Type=Float,Description="Allele Frequency, for each ALT allele, in the same order as listed">
##INFO=<ID=AN,Number=1,Type=Integer,Description="Total number of alleles in called genotypes">
##INFO=<ID=DB,Number=0,Type=Flag,Description="dbSNP Membership">
##INFO=<ID=DP,Number=1,Type=Integer,Description="Approximate read depth (informative and non-informative); some reads may have been filtered based on mapq etc.">
##INFO=<ID=END,Number=1,Type=Integer,Description="Stop position of the interval">
##INFO=<ID=FS,Number=1,Type=Float,Description="Phred-scaled p-value using Fisher's exact test to detect strand bias">
##INFO=<ID=FractionInformativeReads,Number=1,Type=Float,Description="The fraction of informative reads out of the total reads">
##INFO=<ID=MQ,Number=1,Type=Float,Description="RMS Mapping Quality">
##INFO=<ID=MQRankSum,Number=1,Type=Float,Description="Z-score From Wilcoxon rank sum test of Alt vs. Ref read mapping qualities">
##INFO=<ID=QD,Number=1,Type=Float,Description="Variant Confidence/Quality by Depth">
##INFO=<ID=R2_5P_bias,Number=1,Type=Float,Description="Score based on mate bias and distance from 5 prime end">
##INFO=<ID=ReadPosRankSum,Number=1,Type=Float,Description="Z-score from Wilcoxon rank sum test of Alt vs. Ref read position bias">
##INFO=<ID=SOR,Number=1,Type=Float,Description="Symmetric Odds Ratio of 2x2 contingency table to detect strand bias">
##FILTER=<ID=DRAGENSnpHardQUAL,Description="Set if true:QUAL < 10.41">
##FILTER=<ID=DRAGENIndelHardQUAL,Description="Set if true:QUAL < 7.83">
##FILTER=<ID=LowDepth,Description="Set if true:DP <= 1">
##FILTER=<ID=LowGQ,Description="Set if true:GQ = 0">
##FILTER=<ID=PloidyConflict,Description="Genotype call from variant caller not consistent with chromosome ploidy">
##FILTER=<ID=RMxNRepeatRegion,Description="Site filtered because all or part of the variant allele is a repeat of the reference">
##contig=<ID=ENA|KF241981|KF241981.1,length=140447>
##reference=file:///data/scratch/Ref_Zm_Cp_KF241981.v8/254780843/reference.bin
#CHROM	POS	ID	REF	ALT	QUAL	FILTER	INFO	FORMAT	302334
ENA|KF241981|KF241981.1	3242	.	GC	G	447.47	PASS	AC=2;AF=1.000;AN=2;DP=150;FS=0.000;MQ=245.00;QD=2.98;SOR=1.505;FractionInformativeReads=0.887	GT:AD:AF:DP:F1R2:F2R1:GQ:PL:GP:PRI:SB:MB	1/1:0,133:1.000:133:0,65:0,68:397:488,400,0:4.4853e+02,3.9747e+02,0.0000e+00:0.00,38.00,41.00:0,0,46,87:0,0,76,57
ENA|KF241981|KF241981.1	3754	.	T	TAA	352.53	PASS	AC=2;AF=1.000;AN=2;DP=134;FS=0.000;MQ=246.03;MQRankSum=1.605;QD=2.63;ReadPosRankSum=1.414;SOR=0.504;FractionInformativeReads=0.813;R2_5P_bias=0.000	GT:AD:AF:DP:F1R2:F2R1:GQ:PL:GP:PRI:SB:MB	1/1:1,108:0.991:109:1,53:0,55:303:363,306,0:3.5253e+02,3.0253e+02,0.0000e+00:0.00,7.00,10.00:0,1,41,67:0,1,54,54
ENA|KF241981|KF241981.1	12961	.	A	ATTTTTT,ATTTTTTT	415.69	PASS	AC=1,1;AF=0.500,0.500;AN=2;DP=134;FS=0.000;MQ=241.89;MQRankSum=1.311;QD=3.10;ReadPosRankSum=1.344;SOR=1.526;FractionInformativeReads=0.799;R2_5P_bias=0.000	GT:AD:AF:DP:F1R2:F2R1:GQ:PL:GP:PRI:SB:MB	1/2:1,74,32:0.692,0.299:107:0,40,17:1,34,15:45:428,372,49,542,0,56:4.1569e+02,3.6569e+02,4.6240e+01,4.5000e+02,1.2503e-04,5.3000e+01:0.00,6.00,9.00,6.00,12.00,9.00:1,0,34,72:0,1,57,49
ENA|KF241981|KF241981.1	96133	.	C	A	31.78	PASS	AC=2;AF=1.000;AN=2;DP=2;FS=0.000;MQ=27.00;QD=15.89;SOR=2.303;FractionInformativeReads=1.000	GT:AD:AF:DP:F1R2:F2R1:GQ:PL:GP:PRI:SB:MB:PS	1|1:0,2:1.000:2:0,2:0,0:5:68,6,0:3.1781e+01,4.7808e+00,1.7605e+00:0.00,34.77,37.77:0,0,2,0:0,0,2,0:96133
ENA|KF241981|KF241981.1	96135	.	C	A	31.78	PASS	AC=2;AF=1.000;AN=2;DP=2;FS=0.000;MQ=27.00;QD=15.89;SOR=2.303;FractionInformativeReads=1.000	GT:AD:AF:DP:F1R2:F2R1:GQ:PL:GP:PRI:SB:MB:PS	1|1:0,2:1.000:2:0,2:0,0:5:68,6,0:3.1781e+01,4.7808e+00,1.7605e+00:0.00,34.77,37.77:0,0,2,0:0,0,2,0:96133
ENA|KF241981|KF241981.1	96138	.	A	ACTT	31.78	PASS	AC=2;AF=1.000;AN=2;DP=2;FS=0.000;MQ=27.00;QD=15.89;SOR=2.303;FractionInformativeReads=1.000	GT:AD:AF:DP:F1R2:F2R1:GQ:PL:GP:PRI:SB:MB:PS	1|1:0,2:1.000:2:0,2:0,0:5:71,6,0:3.1781e+01,4.7808e+00,1.7605e+00:0.00,38.00,41.00:0,0,2,0:0,0,2,0:96133
ENA|KF241981|KF241981.1	96141	.	CTCTTGAA	C	31.78	PASS	AC=2;AF=1.000;AN=2;DP=2;FS=0.000;MQ=27.00;QD=15.89;SOR=2.303;FractionInformativeReads=1.000	GT:AD:AF:DP:F1R2:F2R1:GQ:PL:GP:PRI:SB:MB:PS	1|1:0,2:1.000:2:0,2:0,0:5:71,6,0:3.1781e+01,4.7808e+00,1.7605e+00:0.00,38.00,41.00:0,0,2,0:0,0,2,0:96133
ENA|KF241981|KF241981.1	96153	.	A	AT	31.78	PASS	AC=2;AF=1.000;AN=2;DP=2;FS=0.000;MQ=27.00;QD=15.89;SOR=2.303;FractionInformativeReads=1.000	GT:AD:AF:DP:F1R2:F2R1:GQ:PL:GP:PRI:SB:MB:PS	1|1:0,2:1.000:2:0,2:0,0:5:67,6,0:3.1780e+01,4.7804e+00,1.7606e+00:0.00,34.00,37.00:0,0,2,0:0,0,2,0:96133
ENA|KF241981|KF241981.1	96155	.	G	GATT	31.78	PASS	AC=2;AF=1.000;AN=2;DP=2;FS=0.000;MQ=27.00;QD=15.89;SOR=2.303;FractionInformativeReads=1.000	GT:AD:AF:DP:F1R2:F2R1:GQ:PL:GP:PRI:SB:MB:PS	1|1:0,2:1.000:2:0,2:0,0:5:67,6,0:3.1781e+01,4.7808e+00,1.7605e+00:0.00,34.00,37.00:0,0,2,0:0,0,2,0:96133
ENA|KF241981|KF241981.1	96162	.	C	T	31.78	PASS	AC=2;AF=1.000;AN=2;DP=2;FS=0.000;MQ=27.00;QD=15.89;SOR=2.303;FractionInformativeReads=1.000	GT:AD:AF:DP:F1R2:F2R1:GQ:PL:GP:PRI:SB:MB:PS	1|1:0,2:1.000:2:0,2:0,0:5:68,6,0:3.1781e+01,4.7808e+00,1.7605e+00:0.00,34.77,37.77:0,0,2,0:0,0,2,0:96133
ENA|KF241981|KF241981.1	96171	.	G	T	31.78	PASS	AC=2;AF=1.000;AN=2;DP=2;FS=0.000;MQ=27.00;QD=15.89;SOR=2.303;FractionInformativeReads=1.000	GT:AD:AF:DP:F1R2:F2R1:GQ:PL:GP:PRI:SB:MB:PS	1|1:0,2:1.000:2:0,2:0,0:5:68,6,0:3.1781e+01,4.7808e+00,1.7605e+00:0.00,34.77,37.77:0,0,2,0:0,0,2,0:96133
ENA|KF241981|KF241981.1	96173	.	G	T	31.78	PASS	AC=2;AF=1.000;AN=2;DP=2;FS=0.000;MQ=27.00;QD=15.89;SOR=2.303;FractionInformativeReads=1.000	GT:AD:AF:DP:F1R2:F2R1:GQ:PL:GP:PRI:SB:MB:PS	1|1:0,2:1.000:2:0,2:0,0:5:68,6,0:3.1781e+01,4.7808e+00,1.7605e+00:0.00,34.77,37.77:0,0,2,0:0,0,2,0:96133
ENA|KF241981|KF241981.1	96184	.	G	C	34	PASS	AC=2;AF=1.000;AN=2;DP=3;FS=0.000;MQ=27.00;QD=11.33;SOR=2.833;FractionInformativeReads=1.000	GT:AD:AF:DP:F1R2:F2R1:GQ:PL:GP:PRI:SB:MB	1/1:0,3:1.000:3:0,3:0,0:7:71,9,0:3.3999e+01,6.9989e+00,9.6897e-01:0.00,34.77,37.77:0,0,3,0:0,0,3,0
ENA|KF241981|KF241981.1	96208	.	C	T	34	PASS	AC=2;AF=1.000;AN=2;DP=3;FS=0.000;MQ=27.00;QD=11.33;SOR=2.833;FractionInformativeReads=1.000	GT:AD:AF:DP:F1R2:F2R1:GQ:PL:GP:PRI:SB:MB:PS	1|1:0,3:1.000:3:0,3:0,0:7:71,9,0:3.3999e+01,6.9993e+00,9.6886e-01:0.00,34.77,37.77:0,0,3,0:0,0,3,0:96208
ENA|KF241981|KF241981.1	96212	.	A	G	34	PASS	AC=2;AF=1.000;AN=2;DP=3;FS=0.000;MQ=27.00;QD=11.33;SOR=2.833;FractionInformativeReads=1.000	GT:AD:AF:DP:F1R2:F2R1:GQ:PL:GP:PRI:SB:MB:PS	1|1:0,3:1.000:3:0,3:0,0:7:71,9,0:3.3999e+01,6.9989e+00,9.6897e-01:0.00,34.77,37.77:0,0,3,0:0,0,3,0:96208
ENA|KF241981|KF241981.1	96215	.	G	A	36.54	PASS	AC=2;AF=1.000;AN=2;DP=4;FS=0.000;MQ=27.00;QD=9.14;SOR=0.693;FractionInformativeReads=1.000	GT:AD:AF:DP:F1R2:F2R1:GQ:PL:GP:PRI:SB:MB:PS	1|1:0,4:1.000:4:0,4:0,0:10:74,12,0:3.6544e+01,9.5443e+00,5.1237e-01:0.00,34.77,37.77:0,0,2,2:0,0,2,2:96208
ENA|KF241981|KF241981.1	96230	.	T	C	36.55	PASS	AC=2;AF=1.000;AN=2;DP=4;FS=0.000;MQ=27.00;QD=9.14;SOR=3.258;FractionInformativeReads=1.000	GT:AD:AF:DP:F1R2:F2R1:GQ:PL:GP:PRI:SB:MB:PS	1|1:0,4:1.000:4:0,4:0,0:10:74,12,0:3.6549e+01,9.5494e+00,5.1173e-01:0.00,34.77,37.77:0,0,0,4:0,0,0,4:96230
ENA|KF241981|KF241981.1	96233	.	C	T	36.55	PASS	AC=2;AF=1.000;AN=2;DP=4;FS=0.000;MQ=27.00;QD=9.14;SOR=3.258;FractionInformativeReads=1.000	GT:AD:AF:DP:F1R2:F2R1:GQ:PL:GP:PRI:SB:MB:PS	1|1:0,4:1.000:4:0,4:0,0:10:74,12,0:3.6550e+01,9.5496e+00,5.1171e-01:0.00,34.77,37.77:0,0,0,4:0,0,0,4:96230
ENA|KF241981|KF241981.1	96248	.	TCG	T	36.55	PASS	AC=2;AF=1.000;AN=2;DP=4;FS=0.000;MQ=27.00;QD=9.14;SOR=3.258;FractionInformativeReads=1.000	GT:AD:AF:DP:F1R2:F2R1:GQ:PL:GP:PRI:SB:MB:PS	1|1:0,4:1.000:4:0,4:0,0:10:77,12,0:3.6552e+01,9.5521e+00,5.1140e-01:0.00,38.00,41.00:0,0,0,4:0,0,0,4:96248
ENA|KF241981|KF241981.1	96253	.	T	TCC	36.55	PASS	AC=2;AF=1.000;AN=2;DP=4;FS=0.000;MQ=27.00;QD=9.14;SOR=3.258;FractionInformativeReads=1.000	GT:AD:AF:DP:F1R2:F2R1:GQ:PL:GP:PRI:SB:MB:PS	1|1:0,4:1.000:4:0,4:0,0:10:75,12,0:3.6552e+01,9.5520e+00,5.1140e-01:0.00,36.00,39.00:0,0,0,4:0,0,0,4:96248
ENA|KF241981|KF241981.1	96260	.	G	A	36.54	PASS	AC=2;AF=1.000;AN=2;DP=4;FS=0.000;MQ=27.00;QD=9.14;SOR=3.258;FractionInformativeReads=1.000	GT:AD:AF:DP:F1R2:F2R1:GQ:PL:GP:PRI:SB:MB:PS	1|1:0,4:1.000:4:0,4:0,0:10:74,12,0:3.6544e+01,9.5441e+00,5.1240e-01:0.00,34.77,37.77:0,0,0,4:0,0,0,4:96248
ENA|KF241981|KF241981.1	96263	.	A	AG	36.55	PASS	AC=2;AF=1.000;AN=2;DP=4;FS=0.000;MQ=27.00;QD=9.14;SOR=3.258;FractionInformativeReads=1.000	GT:AD:AF:DP:F1R2:F2R1:GQ:PL:GP:PRI:SB:MB:PS	1|1:0,4:1.000:4:0,4:0,0:10:77,12,0:3.6551e+01,9.5511e+00,5.1152e-01:0.00,38.00,41.00:0,0,0,4:0,0,0,4:96248
ENA|KF241981|KF241981.1	96264	.	C	CACGT	36.55	PASS	AC=2;AF=1.000;AN=2;DP=4;FS=0.000;MQ=27.00;QD=9.14;SOR=3.258;FractionInformativeReads=1.000	GT:AD:AF:DP:F1R2:F2R1:GQ:PL:GP:PRI:SB:MB:PS	1|1:0,4:1.000:4:0,4:0,0:10:77,12,0:3.6552e+01,9.5520e+00,5.1140e-01:0.00,38.00,41.00:0,0,0,4:0,0,0,4:96248
ENA|KF241981|KF241981.1	96268	.	GA	G	36.55	PASS	AC=2;AF=1.000;AN=2;DP=4;FS=0.000;MQ=27.00;QD=9.14;SOR=3.258;FractionInformativeReads=1.000	GT:AD:AF:DP:F1R2:F2R1:GQ:PL:GP:PRI:SB:MB:PS	1|1:0,4:1.000:4:0,4:0,0:10:77,12,0:3.6551e+01,9.5512e+00,5.1152e-01:0.00,38.00,41.00:0,0,0,4:0,0,0,4:96248
ENA|KF241981|KF241981.1	96270	.	GT	G	36.55	PASS	AC=2;AF=1.000;AN=2;DP=4;FS=0.000;MQ=27.00;QD=9.14;SOR=3.258;FractionInformativeReads=1.000	GT:AD:AF:DP:F1R2:F2R1:GQ:PL:GP:PRI:SB:MB:PS	1|1:0,4:1.000:4:0,4:0,0:10:75,12,0:3.6550e+01,9.5498e+00,5.1169e-01:0.00,36.00,39.00:0,0,0,4:0,0,0,4:96248
ENA|KF241981|KF241981.1	96273	.	T	G	36.55	PASS	AC=2;AF=1.000;AN=2;DP=4;FS=0.000;MQ=27.00;QD=9.14;SOR=3.258;FractionInformativeReads=1.000	GT:AD:AF:DP:F1R2:F2R1:GQ:PL:GP:PRI:SB:MB:PS	1|1:0,4:1.000:4:0,4:0,0:10:74,12,0:3.6552e+01,9.5521e+00,5.1140e-01:0.00,34.77,37.77:0,0,0,4:0,0,0,4:96248
ENA|KF241981|KF241981.1	96276	.	A	C	36.55	PASS	AC=2;AF=1.000;AN=2;DP=4;FS=0.000;MQ=27.00;QD=9.14;SOR=3.258;FractionInformativeReads=1.000	GT:AD:AF:DP:F1R2:F2R1:GQ:PL:GP:PRI:SB:MB:PS	1|1:0,4:1.000:4:0,4:0,0:10:74,12,0:3.6552e+01,9.5519e+00,5.1142e-01:0.00,34.77,37.77:0,0,0,4:0,0,0,4:96248
ENA|KF241981|KF241981.1	96279	.	C	T	36.55	PASS	AC=2;AF=1.000;AN=2;DP=4;FS=0.000;MQ=27.00;QD=9.14;SOR=3.258;FractionInformativeReads=1.000	GT:AD:AF:DP:F1R2:F2R1:GQ:PL:GP:PRI:SB:MB:PS	1|1:0,4:1.000:4:0,4:0,0:10:74,12,0:3.6550e+01,9.5496e+00,5.1171e-01:0.00,34.77,37.77:0,0,0,4:0,0,0,4:96248
ENA|KF241981|KF241981.1	96282	.	G	A	36.55	PASS	AC=2;AF=1.000;AN=2;DP=4;FS=0.000;MQ=27.00;QD=9.14;SOR=3.258;FractionInformativeReads=1.000	GT:AD:AF:DP:F1R2:F2R1:GQ:PL:GP:PRI:SB:MB:PS	1|1:0,4:1.000:4:0,4:0,0:10:74,12,0:3.6552e+01,9.5521e+00,5.1140e-01:0.00,34.77,37.77:0,0,0,4:0,0,0,4:96248
ENA|KF241981|KF241981.1	96284	.	A	G	36.55	PASS	AC=2;AF=1.000;AN=2;DP=4;FS=0.000;MQ=27.00;QD=9.14;SOR=3.258;FractionInformativeReads=1.000	GT:AD:AF:DP:F1R2:F2R1:GQ:PL:GP:PRI:SB:MB:PS	1|1:0,4:1.000:4:0,4:0,0:10:74,12,0:3.6551e+01,9.5514e+00,5.1149e-01:0.00,34.77,37.77:0,0,0,4:0,0,0,4:96248
ENA|KF241981|KF241981.1	96285	.	C	G	36.55	PASS	AC=2;AF=1.000;AN=2;DP=4;FS=0.000;MQ=27.00;QD=9.14;SOR=3.258;FractionInformativeReads=1.000	GT:AD:AF:DP:F1R2:F2R1:GQ:PL:GP:PRI:SB:MB:PS	1|1:0,4:1.000:4:0,4:0,0:10:74,12,0:3.6551e+01,9.5511e+00,5.1152e-01:0.00,34.77,37.77:0,0,0,4:0,0,0,4:96248
ENA|KF241981|KF241981.1	96290	.	C	T	36.55	PASS	AC=2;AF=1.000;AN=2;DP=4;FS=0.000;MQ=27.00;QD=9.14;SOR=3.258;FractionInformativeReads=1.000	GT:AD:AF:DP:F1R2:F2R1:GQ:PL:GP:PRI:SB:MB:PS	1|1:0,4:1.000:4:0,4:0,0:10:74,12,0:3.6552e+01,9.5519e+00,5.1142e-01:0.00,34.77,37.77:0,0,0,4:0,0,0,4:96248
ENA|KF241981|KF241981.1	96298	.	T	A	36.55	PASS	AC=2;AF=1.000;AN=2;DP=4;FS=0.000;MQ=27.00;QD=9.14;SOR=3.258;FractionInformativeReads=1.000	GT:AD:AF:DP:F1R2:F2R1:GQ:PL:GP:PRI:SB:MB:PS	1|1:0,4:1.000:4:0,4:0,0:10:74,12,0:3.6552e+01,9.5519e+00,5.1142e-01:0.00,34.77,37.77:0,0,0,4:0,0,0,4:96248
ENA|KF241981|KF241981.1	98405	.	G	T	7.8	DRAGENSnpHardQUAL;LowDepth	AC=2;AF=1.000;AN=2;DP=1;FS=0.000;MQ=25.00;QD=7.80;SOR=1.609;FractionInformativeReads=1.000	GT:AD:AF:DP:F1R2:F2R1:GQ:PL:GP:PRI:SB:MB	1/1:0,1:1.000:1:0,1:0,0:2:42,3,0:7.7976e+00,3.8039e+00,3.7939e+00:0.00,34.77,37.77:0,0,1,0:0,0,1,0
ENA|KF241981|KF241981.1	126169	.	C	G	10.52	LowDepth	AC=2;AF=1.000;AN=2;DP=1;FS=0.000;MQ=22.00;QD=10.52;SOR=1.609;FractionInformativeReads=1.000	GT:AD:AF:DP:F1R2:F2R1:GQ:PL:GP:PRI:SB:MB:PS	1|1:0,1:1.000:1:0,0:0,1:3:45,3,0:1.0518e+01,3.4191e+00,3.4089e+00:0.00,34.77,37.77:0,0,1,0:0,0,0,1:126169
ENA|KF241981|KF241981.1	126170	.	C	G	10.52	LowDepth	AC=2;AF=1.000;AN=2;DP=1;FS=0.000;MQ=22.00;QD=10.52;SOR=1.609;FractionInformativeReads=1.000	GT:AD:AF:DP:F1R2:F2R1:GQ:PL:GP:PRI:SB:MB:PS	1|1:0,1:1.000:1:0,0:0,1:3:45,3,0:1.0518e+01,3.4191e+00,3.4089e+00:0.00,34.77,37.77:0,0,1,0:0,0,0,1:126169
ENA|KF241981|KF241981.1	126175	.	A	C	10.52	LowDepth	AC=2;AF=1.000;AN=2;DP=1;FS=0.000;MQ=22.00;QD=10.52;SOR=1.609;FractionInformativeReads=1.000	GT:AD:AF:DP:F1R2:F2R1:GQ:PL:GP:PRI:SB:MB:PS	1|1:0,1:1.000:1:0,0:0,1:3:45,3,0:1.0518e+01,3.4191e+00,3.4089e+00:0.00,34.77,37.77:0,0,1,0:0,0,0,1:126169
ENA|KF241981|KF241981.1	126176	.	G	C	10.52	LowDepth	AC=2;AF=1.000;AN=2;DP=1;FS=0.000;MQ=22.00;QD=10.52;SOR=1.609;FractionInformativeReads=1.000	GT:AD:AF:DP:F1R2:F2R1:GQ:PL:GP:PRI:SB:MB:PS	1|1:0,1:1.000:1:0,0:0,1:3:45,3,0:1.0518e+01,3.4191e+00,3.4089e+00:0.00,34.77,37.77:0,0,1,0:0,0,0,1:126169
ENA|KF241981|KF241981.1	126202	.	T	C	29.78	PASS	AC=2;AF=1.000;AN=2;DP=2;FS=0.000;MQ=23.55;QD=14.89;SOR=2.303;FractionInformativeReads=1.000	GT:AD:AF:DP:F1R2:F2R1:GQ:PL:GP:PRI:SB:MB:PS	1|1:0,2:1.000:2:0,1:0,1:5:66,6,0:2.9782e+01,4.7825e+00,1.7621e+00:0.00,34.77,37.77:0,0,2,0:0,0,1,1:126202
ENA|KF241981|KF241981.1	126208	.	C	CAT	29.78	PASS	AC=2;AF=1.000;AN=2;DP=2;FS=0.000;MQ=23.55;QD=14.89;SOR=2.303;FractionInformativeReads=1.000	GT:AD:AF:DP:F1R2:F2R1:GQ:PL:GP:PRI:SB:MB:PS	1|1:0,2:1.000:2:0,1:0,1:5:69,6,0:2.9782e+01,4.7825e+00,1.7621e+00:0.00,38.00,41.00:0,0,2,0:0,0,1,1:126202
ENA|KF241981|KF241981.1	126209	.	GC	G	29.78	PASS	AC=2;AF=1.000;AN=2;DP=2;FS=0.000;MQ=23.55;QD=14.89;SOR=2.303;FractionInformativeReads=1.000	GT:AD:AF:DP:F1R2:F2R1:GQ:PL:GP:PRI:SB:MB	1/1:0,2:1.000:2:0,1:0,1:5:69,6,0:2.9782e+01,4.7821e+00,1.7623e+00:0.00,38.00,41.00:0,0,2,0:0,0,1,1
ENA|KF241981|KF241981.1	126213	.	G	T	29.78	PASS	AC=2;AF=1.000;AN=2;DP=2;FS=0.000;MQ=23.55;QD=14.89;SOR=2.303;FractionInformativeReads=1.000	GT:AD:AF:DP:F1R2:F2R1:GQ:PL:GP:PRI:SB:MB:PS	1|1:0,2:1.000:2:0,1:0,1:5:66,6,0:2.9782e+01,4.7821e+00,1.7623e+00:0.00,34.77,37.77:0,0,2,0:0,0,1,1:126213
ENA|KF241981|KF241981.1	126215	.	C	A	29.78	PASS	AC=2;AF=1.000;AN=2;DP=2;FS=0.000;MQ=23.55;QD=14.89;SOR=2.303;FractionInformativeReads=1.000	GT:AD:AF:DP:F1R2:F2R1:GQ:PL:GP:PRI:SB:MB	1/1:0,2:1.000:2:0,1:0,1:5:66,6,0:2.9782e+01,4.7824e+00,1.7622e+00:0.00,34.77,37.77:0,0,2,0:0,0,1,1
ENA|KF241981|KF241981.1	126216	.	T	C	28.94	PASS	AC=2;AF=1.000;AN=2;DP=2;FS=0.000;MQ=23.55;QD=14.47;SOR=2.303;FractionInformativeReads=1.000	GT:AD:AF:DP:F1R2:F2R1:GQ:PL:GP:PRI:SB:MB:PS	1|1:0,2:1.000:2:0,1:0,1:5:65,6,0:2.8942e+01,4.7834e+00,1.7631e+00:0.00,34.77,37.77:0,0,2,0:0,0,1,1:126213
ENA|KF241981|KF241981.1	126217	.	AG	A	32	PASS	AC=2;AF=1.000;AN=2;DP=3;FS=0.000;MQ=24.04;QD=10.67;SOR=2.833;FractionInformativeReads=1.000	GT:AD:AF:DP:F1R2:F2R1:GQ:PL:GP:PRI:SB:MB:PS	1|1:0,3:1.000:3:0,2:0,1:7:72,9,0:3.1998e+01,6.9983e+00,9.7038e-01:0.00,38.00,41.00:0,0,3,0:0,0,2,1:126213
ENA|KF241981|KF241981.1	126221	.	T	G	32	PASS	AC=2;AF=1.000;AN=2;DP=3;FS=0.000;MQ=24.04;QD=10.67;SOR=2.833;FractionInformativeReads=1.000	GT:AD:AF:DP:F1R2:F2R1:GQ:PL:GP:PRI:SB:MB:PS	1|1:0,3:1.000:3:0,2:0,1:7:69,9,0:3.2000e+01,7.0001e+00,9.6992e-01:0.00,34.77,37.77:0,0,3,0:0,0,2,1:126213
ENA|KF241981|KF241981.1	126222	.	TA	T	25.04	PASS	AC=1;AF=0.500;AN=2;DP=6;FS=0.000;MQ=24.53;MQRankSum=0.736;QD=4.17;ReadPosRankSum=0.736;SOR=2.303;FractionInformativeReads=1.000;R2_5P_bias=-7.080	GT:AD:AF:DP:F1R2:F2R1:GQ:PL:GP:PRI:SB:MB:PS	0|1:1,5:0.833:6:1,3:0,2:20:63,0,19:2.5043e+01,4.3013e-02,2.1724e+01:0.00,38.00,41.00:1,0,5,0:1,0,3,2:126213
ENA|KF241981|KF241981.1	126226	.	C	T	25.04	PASS	AC=1;AF=0.500;AN=2;DP=6;FS=0.000;MQ=24.53;MQRankSum=0.736;QD=4.17;ReadPosRankSum=0.736;SOR=2.303;FractionInformativeReads=1.000;R2_5P_bias=-7.080	GT:AD:AF:DP:F1R2:F2R1:GQ:PL:GP:PRI:SB:MB:PS	0|1:1,5:0.833:6:1,3:0,2:20:60,0,19:2.5043e+01,4.3023e-02,2.1722e+01:0.00,34.77,37.77:1,0,5,0:1,0,3,2:126213
ENA|KF241981|KF241981.1	126228	.	T	A	25.04	PASS	AC=1;AF=0.500;AN=2;DP=6;FS=0.000;MQ=24.53;MQRankSum=0.736;QD=4.17;ReadPosRankSum=0.736;SOR=2.303;FractionInformativeReads=1.000;R2_5P_bias=-7.080	GT:AD:AF:DP:F1R2:F2R1:GQ:PL:GP:PRI:SB:MB:PS	0|1:1,5:0.833:6:1,3:0,2:20:60,0,19:2.5043e+01,4.3025e-02,2.1722e+01:0.00,34.77,37.77:1,0,5,0:1,0,3,2:126213
ENA|KF241981|KF241981.1	126230	.	C	CG	25.03	PASS	AC=1;AF=0.500;AN=2;DP=7;FS=0.000;MQ=24.59;MQRankSum=0.922;QD=3.58;ReadPosRankSum=1.495;SOR=1.609;FractionInformativeReads=1.000;R2_5P_bias=-14.052	GT:AD:AF:DP:F1R2:F2R1:GQ:PL:GP:PRI:SB:MB:PS	0|1:2,5:0.714:7:2,3:0,2:22:56,0,22:2.5027e+01,2.7022e-02,2.5143e+01:0.00,31.00,34.00:2,0,5,0:2,0,3,2:126213
ENA|KF241981|KF241981.1	126231	.	C	T	25.03	PASS	AC=1;AF=0.500;AN=2;DP=7;FS=0.000;MQ=24.59;MQRankSum=0.922;QD=3.58;ReadPosRankSum=1.495;SOR=1.609;FractionInformativeReads=1.000;R2_5P_bias=-14.052	GT:AD:AF:DP:F1R2:F2R1:GQ:PL:GP:PRI:SB:MB:PS	0|1:2,5:0.714:7:2,3:0,2:22:60,0,22:2.5027e+01,2.7022e-02,2.5143e+01:0.00,34.77,37.77:2,0,5,0:2,0,3,2:126213
ENA|KF241981|KF241981.1	126233	.	CTCCTTA	C	22.15	PASS	AC=1;AF=0.500;AN=2;DP=7;FS=0.000;MQ=24.59;MQRankSum=1.495;QD=3.16;ReadPosRankSum=-1.495;SOR=0.223;FractionInformativeReads=1.000;R2_5P_bias=17.964	GT:AD:AF:DP:F1R2:F2R1:GQ:PL:GP:PRI:SB:MB	0/1:5,2:0.286:7:3,2:2,0:21:60,0,25:2.2149e+01,3.3436e-02,2.8033e+01:0.00,38.00,41.00:5,0,2,0:3,2,2,0
ENA|KF241981|KF241981.1	126236	.	CTTA	C	25.03	PASS	AC=1;AF=0.500;AN=2;DP=7;FS=0.000;MQ=24.59;MQRankSum=0.922;QD=3.58;ReadPosRankSum=1.495;SOR=1.609;FractionInformativeReads=1.000;R2_5P_bias=-14.052	GT:AD:AF:DP:F1R2:F2R1:GQ:PL:GP:PRI:SB:MB:PS	0|1:2,5:0.714:7:2,3:0,2:22:63,0,22:2.5027e+01,2.7022e-02,2.5143e+01:0.00,38.00,41.00:2,0,5,0:2,0,3,2:126213
ENA|KF241981|KF241981.1	126241	.	GGTT	G	43.14	PASS	AC=2;AF=1.000;AN=2;DP=7;FS=0.000;MQ=24.59;QD=6.16;SOR=4.174;FractionInformativeReads=1.000	GT:AD:AF:DP:F1R2:F2R1:GQ:PL:GP:PRI:SB:MB:PS	1|1:0,7:1.000:7:0,5:0,2:18:84,21,0:4.3139e+01,1.8139e+01,6.7401e-02:0.00,38.00,41.00:0,0,7,0:0,0,5,2:126202
ENA|KF241981|KF241981.1	126249	.	G	T	39.27	PASS	AC=2;AF=1.000;AN=2;DP=10;FS=0.000;MQ=24.40;MQRankSum=0.751;QD=3.93;ReadPosRankSum=0.751;SOR=3.056;FractionInformativeReads=0.900;R2_5P_bias=0.000	GT:AD:AF:DP:F1R2:F2R1:GQ:PL:GP:PRI:SB:MB:PS	1|1:1,8:0.889:9:0,5:1,3:14:77,17,0:3.9269e+01,1.4269e+01,1.6618e-01:0.00,34.77,37.77:1,0,8,0:0,1,5,3:126249
ENA|KF241981|KF241981.1	126251	.	AAT	A	46.18	PASS	AC=2;AF=1.000;AN=2;DP=11;FS=0.000;MQ=24.46;QD=4.20;SOR=4.407;FractionInformativeReads=0.727	GT:AD:AF:DP:F1R2:F2R1:GQ:PL:GP:PRI:SB:MB:PS	1|1:0,8:1.000:8:0,5:0,3:21:87,24,0:4.6179e+01,2.1163e+01,3.3462e-02:0.00,38.00,41.00:0,0,8,0:0,0,5,3:126249
ENA|KF241981|KF241981.1	126257	.	TTCA	T	46.21	PASS	AC=2;AF=1.000;AN=2;DP=11;FS=0.000;MQ=25.24;QD=4.20;SOR=4.407;FractionInformativeReads=0.727	GT:AD:AF:DP:F1R2:F2R1:GQ:PL:GP:PRI:SB:MB:PS	1|1:0,8:1.000:8:0,5:0,3:21:87,24,0:4.6212e+01,2.1188e+01,3.3268e-02:0.00,38.00,41.00:0,0,8,0:0,0,5,3:126249
ENA|KF241981|KF241981.1	126261	.	A	AGCT	49.04	PASS	AC=2;AF=1.000;AN=2;DP=11;FS=0.000;MQ=25.24;QD=4.46;SOR=4.615;FractionInformativeReads=0.818	GT:AD:AF:DP:F1R2:F2R1:GQ:PL:GP:PRI:SB:MB:PS	1|1:0,9:1.000:9:0,6:0,3:24:88,27,0:4.9036e+01,2.4060e+01,1.7140e-02:0.00,36.00,39.00:0,0,9,0:0,0,6,3:126249
ENA|KF241981|KF241981.1	126263	.	C	CTT	52.08	PASS	AC=2;AF=1.000;AN=2;DP=11;FS=0.000;MQ=25.24;QD=4.73;SOR=4.804;FractionInformativeReads=0.909	GT:AD:AF:DP:F1R2:F2R1:GQ:PL:GP:PRI:SB:MB:PS	1|1:0,10:1.000:10:0,6:0,4:27:93,30,0:5.2078e+01,2.7094e+01,8.5158e-03:0.00,38.00,41.00:0,0,10,0:0,0,6,4:126249
ENA|KF241981|KF241981.1	126267	.	G	GTGCAAC	55.02	PASS	AC=2;AF=1.000;AN=2;DP=12;FS=0.000;MQ=25.22;QD=4.58;SOR=4.977;FractionInformativeReads=0.917	GT:AD:AF:DP:F1R2:F2R1:GQ:PL:GP:PRI:SB:MB:PS	1|1:0,11:1.000:11:0,6:0,5:30:96,33,0:5.5018e+01,3.0067e+01,4.2925e-03:0.00,38.00,41.00:0,0,11,0:0,0,6,5:126249
ENA|KF241981|KF241981.1	126270	.	AG	A	55.13	PASS	AC=2;AF=1.000;AN=2;DP=12;FS=0.000;MQ=25.22;QD=4.59;SOR=4.977;FractionInformativeReads=0.917	GT:AD:AF:DP:F1R2:F2R1:GQ:PL:GP:PRI:SB:MB:PS	1|1:0,11:1.000:11:0,6:0,5:30:96,33,0:5.5129e+01,3.0121e+01,4.2388e-03:0.00,38.00,41.00:0,0,11,0:0,0,6,5:126249
ENA|KF241981|KF241981.1	126276	.	T	C	55.12	PASS	AC=2;AF=1.000;AN=2;DP=12;FS=0.000;MQ=25.22;QD=4.59;SOR=4.977;FractionInformativeReads=0.917	GT:AD:AF:DP:F1R2:F2R1:GQ:PL:GP:PRI:SB:MB:PS	1|1:0,11:1.000:11:0,6:0,5:30:93,33,0:5.5115e+01,3.0115e+01,4.2448e-03:0.00,34.77,37.77:0,0,11,0:0,0,6,5:126249
ENA|KF241981|KF241981.1	126279	.	A	G	55.12	PASS	AC=2;AF=1.000;AN=2;DP=12;FS=0.000;MQ=25.22;QD=4.59;SOR=4.977;FractionInformativeReads=0.917	GT:AD:AF:DP:F1R2:F2R1:GQ:PL:GP:PRI:SB:MB:PS	1|1:0,11:1.000:11:0,6:0,5:30:93,33,0:5.5115e+01,3.0115e+01,4.2448e-03:0.00,34.77,37.77:0,0,11,0:0,0,6,5:126249
ENA|KF241981|KF241981.1	126314	.	G	T	63.12	PASS	AC=2;AF=1.000;AN=2;DP=13;FS=0.000;MQ=25.42;QD=4.86;SOR=3.611;FractionInformativeReads=0.923	GT:AD:AF:DP:F1R2:F2R1:GQ:PL:GP:PRI:SB:MB:PS	1|1:0,12:1.000:12:0,7:0,5:33:101,36,0:6.3124e+01,3.3124e+01,2.1180e-03:0.00,34.77,37.77:0,0,11,1:0,0,8,4:126314
ENA|KF241981|KF241981.1	126323	.	C	CGA	77.7	PASS	AC=2;AF=1.000;AN=2;DP=18;FS=0.000;MQ=24.68;QD=4.32;SOR=0.804;FractionInformativeReads=0.944	GT:AD:AF:DP:F1R2:F2R1:GQ:PL:GP:PRI:SB:MB:PS	1|1:0,17:1.000:17:0,8:0,9:48:119,51,0:7.7696e+01,4.7696e+01,7.3776e-05:0.00,38.00,41.00:0,0,8,9:0,0,11,6:126323
ENA|KF241981|KF241981.1	126324	.	CGT	C	89.7	PASS	AC=2;AF=1.000;AN=2;DP=21;FS=0.000;MQ=23.95;QD=4.27;SOR=0.784;FractionInformativeReads=1.000	GT:AD:AF:DP:F1R2:F2R1:GQ:PL:GP:PRI:SB:MB	1/1:0,21:1.000:21:0,11:0,10:60:131,63,0:8.9700e+01,5.9700e+01,4.6595e-06:0.00,38.00,41.00:0,0,10,11:0,0,14,7
ENA|KF241981|KF241981.1	126328	.	TG	T	87.15	PASS	AC=2;AF=1.000;AN=2;DP=21;FS=0.000;MQ=23.95;QD=4.15;SOR=1.127;FractionInformativeReads=0.952	GT:AD:AF:DP:F1R2:F2R1:GQ:PL:GP:PRI:SB:MB:PS	1|1:0,20:1.000:20:0,10:0,10:57:128,60,0:8.7153e+01,5.7153e+01,8.2835e-06:0.00,38.00,41.00:0,0,8,12:0,0,14,6:126314
ENA|KF241981|KF241981.1	126330	.	G	T	87.19	PASS	AC=2;AF=1.000;AN=2;DP=21;FS=0.000;MQ=23.95;QD=4.15;SOR=0.693;FractionInformativeReads=0.952	GT:AD:AF:DP:F1R2:F2R1:GQ:PL:GP:PRI:SB:MB:PS	1|1:0,20:1.000:20:0,10:0,10:57:125,60,0:8.7190e+01,5.7190e+01,8.2835e-06:0.00,34.77,37.77:0,0,10,10:0,0,10,10:126314
ENA|KF241981|KF241981.1	126334	.	A	ATT	84.16	PASS	AC=2;AF=1.000;AN=2;DP=21;FS=0.000;MQ=23.95;QD=4.01;SOR=1.609;FractionInformativeReads=0.905	GT:AD:AF:DP:F1R2:F2R1:GQ:PL:GP:PRI:SB:MB:PS	1|1:0,19:1.000:19:0,9:0,10:54:125,57,0:8.4160e+01,5.4160e+01,1.6567e-05:0.00,38.00,41.00:0,0,6,13:0,0,12,7:126323
ENA|KF241981|KF241981.1	126335	.	CCG	C	93.21	PASS	AC=2;AF=1.000;AN=2;DP=22;FS=0.000;MQ=23.86;QD=4.24;SOR=1.931;FractionInformativeReads=1.000	GT:AD:AF:DP:F1R2:F2R1:GQ:PL:GP:PRI:SB:MB	1/1:0,22:1.000:22:0,11:0,11:63:134,66,0:9.3212e+01,6.3212e+01,2.0709e-06:0.00,38.00,41.00:0,0,6,16:0,0,11,11
ENA|KF241981|KF241981.1	126356	.	T	G	93.21	PASS	AC=2;AF=1.000;AN=2;DP=22;FS=0.000;MQ=23.86;QD=4.24;SOR=2.303;FractionInformativeReads=1.000	GT:AD:AF:DP:F1R2:F2R1:GQ:PL:GP:PRI:SB:MB:PS	1|1:0,22:1.000:22:0,11:0,11:63:131,66,0:9.3215e+01,6.3215e+01,2.0709e-06:0.00,34.77,37.77:0,0,5,17:0,0,12,10:126356
ENA|KF241981|KF241981.1	126357	.	G	A	92.77	PASS	AC=2;AF=1.000;AN=2;DP=22;FS=0.000;MQ=23.86;QD=4.22;SOR=2.303;FractionInformativeReads=1.000	GT:AD:AF:DP:F1R2:F2R1:GQ:PL:GP:PRI:SB:MB:PS	1|1:0,22:1.000:22:0,11:0,11:63:131,66,0:9.2769e+01,6.2769e+01,2.3297e-06:0.00,34.77,37.77:0,0,5,17:0,0,12,10:126356
ENA|KF241981|KF241981.1	126363	.	T	C	90.21	PASS	AC=2;AF=1.000;AN=2;DP=22;FS=0.000;MQ=23.86;QD=4.10;SOR=2.200;FractionInformativeReads=0.955	GT:AD:AF:DP:F1R2:F2R1:GQ:PL:GP:PRI:SB:MB:PS	1|1:0,21:1.000:21:0,10:0,11:60:128,63,0:9.0212e+01,6.0212e+01,4.1418e-06:0.00,34.77,37.77:0,0,5,16:0,0,12,9:126356
ENA|KF241981|KF241981.1	126368	.	G	T	93.22	PASS	AC=2;AF=1.000;AN=2;DP=22;FS=0.000;MQ=23.86;QD=4.24;SOR=2.303;FractionInformativeReads=1.000	GT:AD:AF:DP:F1R2:F2R1:GQ:PL:GP:PRI:SB:MB:PS	1|1:0,22:1.000:22:0,11:0,11:63:131,66,0:9.3220e+01,6.3220e+01,2.0709e-06:0.00,34.77,37.77:0,0,5,17:0,0,12,10:126356
ENA|KF241981|KF241981.1	126379	.	C	A	93.22	PASS	AC=2;AF=1.000;AN=2;DP=22;FS=0.000;MQ=23.86;QD=4.24;SOR=2.737;FractionInformativeReads=1.000	GT:AD:AF:DP:F1R2:F2R1:GQ:PL:GP:PRI:SB:MB:PS	1|1:0,22:1.000:22:0,11:0,11:63:131,66,0:9.3222e+01,6.3222e+01,2.0709e-06:0.00,34.77,37.77:0,0,4,18:0,0,13,9:126379
ENA|KF241981|KF241981.1	126384	.	A	G	92.76	PASS	AC=2;AF=1.000;AN=2;DP=22;FS=0.000;MQ=23.86;QD=4.22;SOR=2.737;FractionInformativeReads=1.000	GT:AD:AF:DP:F1R2:F2R1:GQ:PL:GP:PRI:SB:MB:PS	1|1:0,22:1.000:22:0,11:0,11:63:131,66,0:9.2762e+01,6.2762e+01,2.3297e-06:0.00,34.77,37.77:0,0,4,18:0,0,13,9:126379
ENA|KF241981|KF241981.1	126390	.	A	G	93.21	PASS	AC=2;AF=1.000;AN=2;DP=22;FS=0.000;MQ=23.86;QD=4.24;SOR=3.258;FractionInformativeReads=1.000	GT:AD:AF:DP:F1R2:F2R1:GQ:PL:GP:PRI:SB:MB:PS	1|1:0,22:1.000:22:0,11:0,11:63:131,66,0:9.3214e+01,6.3214e+01,2.0709e-06:0.00,34.77,37.77:0,0,3,19:0,0,12,10:126379
ENA|KF241981|KF241981.1	126393	.	TGAGG	TAGG,T	240.73	PASS	AC=1,1;AF=0.500,0.500;AN=2;DP=22;FS=0.000;MQ=23.86;QD=10.94;SOR=3.160;FractionInformativeReads=0.955	GT:AD:AF:DP:F1R2:F2R1:GQ:PL:GP:PRI:SB:MB	1/2:0,13,8:0.619,0.381:21:0,7,4:0,6,4:24:317,254,60,409,0,63:2.4073e+02,2.1573e+02,2.5434e+01,3.7104e+02,1.9322e-02,2.8019e+01:0.00,38.00,41.00,38.00,76.00,41.00:0,0,3,18:0,0,11,10
ENA|KF241981|KF241981.1	126396	.	G	C	25.03	PASS	AC=1;AF=0.500;AN=2;DP=22;FS=2.750;MQ=23.86;MQRankSum=1.629;QD=1.14;ReadPosRankSum=1.992;SOR=2.170;FractionInformativeReads=0.955;R2_5P_bias=-26.636	GT:AD:AF:DP:F1R2:F2R1:GQ:PL:GP:PRI:SB:MB:PS	0|1:8,13:0.619:21:4,7:4,6:22:60,0,22:2.5026e+01,2.6207e-02,2.5417e+01:0.00,34.77,37.77:2,6,1,12:4,4,7,6:126396
ENA|KF241981|KF241981.1	126398	.	A	AT	25.03	PASS	AC=1;AF=0.500;AN=2;DP=22;FS=2.750;MQ=23.86;MQRankSum=1.629;QD=1.14;ReadPosRankSum=1.992;SOR=2.170;FractionInformativeReads=0.955;R2_5P_bias=-22.290	GT:AD:AF:DP:F1R2:F2R1:GQ:PL:GP:PRI:SB:MB:PS	0|1:8,13:0.619:21:4,7:4,6:22:63,0,22:2.5026e+01,2.6184e-02,2.5425e+01:0.00,38.00,41.00:2,6,1,12:4,4,7,6:126396
ENA|KF241981|KF241981.1	126400	.	G	GATC	22.42	PASS	AC=1;AF=0.500;AN=2;DP=22;FS=2.750;MQ=23.86;MQRankSum=1.774;QD=1.02;ReadPosRankSum=3.730;SOR=0.121;FractionInformativeReads=0.955;R2_5P_bias=5.254	GT:AD:AF:DP:F1R2:F2R1:GQ:PL:GP:PRI:SB:MB:PS	0|1:13,8:0.381:21:7,4:6,4:21:58,0,25:2.2416e+01,3.1812e-02,2.8056e+01:0.00,36.00,39.00:1,12,2,6:7,6,4,4:126400
ENA|KF241981|KF241981.1	126401	.	GGT	G	25.04	PASS	AC=1;AF=0.500;AN=2;DP=22;FS=2.750;MQ=23.86;MQRankSum=1.629;QD=1.14;ReadPosRankSum=3.730;SOR=2.170;FractionInformativeReads=0.955;R2_5P_bias=-20.842	GT:AD:AF:DP:F1R2:F2R1:GQ:PL:GP:PRI:SB:MB:PS	0|1:8,13:0.619:21:4,7:4,6:22:61,0,22:2.5043e+01,2.6163e-02,2.5414e+01:0.00,36.00,39.00:2,6,1,12:4,4,7,6:126396
ENA|KF241981|KF241981.1	126406	.	T	TA	22.42	PASS	AC=1;AF=0.500;AN=2;DP=22;FS=2.750;MQ=23.86;MQRankSum=1.774;QD=1.02;ReadPosRankSum=3.730;SOR=0.121;FractionInformativeReads=0.955;R2_5P_bias=0.909	GT:AD:AF:DP:F1R2:F2R1:GQ:PL:GP:PRI:SB:MB:PS	0|1:13,8:0.381:21:7,4:6,4:21:53,0,25:2.2419e+01,3.1816e-02,2.8040e+01:0.00,31.00,34.00:1,12,2,6:7,6,4,4:126400
ENA|KF241981|KF241981.1	126408	.	G	GT	25.03	PASS	AC=1;AF=0.500;AN=2;DP=22;FS=2.750;MQ=23.86;MQRankSum=1.629;QD=1.14;ReadPosRankSum=3.730;SOR=2.170;FractionInformativeReads=0.955;R2_5P_bias=-14.324	GT:AD:AF:DP:F1R2:F2R1:GQ:PL:GP:PRI:SB:MB:PS	0|1:8,13:0.619:21:4,7:4,6:22:63,0,22:2.5026e+01,2.6188e-02,2.5423e+01:0.00,38.00,41.00:2,6,1,12:4,4,7,6:126396
ENA|KF241981|KF241981.1	126410	.	A	G	22.59	PASS	AC=1;AF=0.500;AN=2;DP=22;FS=2.750;MQ=23.86;MQRankSum=1.774;QD=1.03;ReadPosRankSum=3.730;SOR=0.121;FractionInformativeReads=0.955;R2_5P_bias=-1.264	GT:AD:AF:DP:F1R2:F2R1:GQ:PL:GP:PRI:SB:MB:PS	0|1:13,8:0.381:21:7,4:6,4:22:57,0,25:2.2593e+01,3.0847e-02,2.8031e+01:0.00,34.77,37.77:1,12,2,6:7,6,4,4:126400
ENA|KF241981|KF241981.1	126411	.	G	GA,A	258.9	PASS	AC=1,1;AF=0.500,0.500;AN=2;DP=22;FS=0.000;MQ=23.86;QD=11.77;SOR=3.160;FractionInformativeReads=0.955	GT:AD:AF:DP:F1R2:F2R1:GQ:PL:GP:PRI:SB:MB	1/2:0,13,8:0.619,0.381:21:0,7,4:0,6,4:24:332,269,57,464,0,63:2.5890e+02,2.3390e+02,2.5413e+01,4.2561e+02,1.9383e-02,2.8019e+01:0.00,38.00,41.00,34.77,72.77,37.77:0,0,3,18:0,0,11,10
ENA|KF241981|KF241981.1	126419	.	A	C	85.2	PASS	AC=2;AF=1.000;AN=2;DP=22;FS=0.000;MQ=23.86;QD=3.87;SOR=3.160;FractionInformativeReads=0.955	GT:AD:AF:DP:F1R2:F2R1:GQ:PL:GP:PRI:SB:MB:PS	1|1:0,21:1.000:21:0,11:0,10:60:123,63,0:8.5204e+01,6.0204e+01,4.1418e-06:0.00,34.77,37.77:0,0,3,18:0,0,11,10:126379
ENA|KF241981|KF241981.1	126420	.	C	A	85.21	PASS	AC=2;AF=1.000;AN=2;DP=22;FS=0.000;MQ=23.86;QD=3.87;SOR=3.160;FractionInformativeReads=0.955	GT:AD:AF:DP:F1R2:F2R1:GQ:PL:GP:PRI:SB:MB:PS	1|1:0,21:1.000:21:0,11:0,10:60:123,63,0:8.5212e+01,6.0212e+01,4.1418e-06:0.00,34.77,37.77:0,0,3,18:0,0,11,10:126379
ENA|KF241981|KF241981.1	126428	.	A	G	84.75	PASS	AC=2;AF=1.000;AN=2;DP=22;FS=0.000;MQ=23.86;QD=3.85;SOR=3.160;FractionInformativeReads=0.955	GT:AD:AF:DP:F1R2:F2R1:GQ:PL:GP:PRI:SB:MB:PS	1|1:0,21:1.000:21:0,11:0,10:60:123,63,0:8.4752e+01,5.9752e+01,4.6595e-06:0.00,34.77,37.77:0,0,3,18:0,0,11,10:126379
ENA|KF241981|KF241981.1	126429	.	G	C	85.21	PASS	AC=2;AF=1.000;AN=2;DP=22;FS=0.000;MQ=23.86;QD=3.87;SOR=3.160;FractionInformativeReads=0.955	GT:AD:AF:DP:F1R2:F2R1:GQ:PL:GP:PRI:SB:MB:PS	1|1:0,21:1.000:21:0,11:0,10:60:123,63,0:8.5213e+01,6.0213e+01,4.1418e-06:0.00,34.77,37.77:0,0,3,18:0,0,11,10:126379
ENA|KF241981|KF241981.1	126430	.	A	T	85.21	PASS	AC=2;AF=1.000;AN=2;DP=22;FS=0.000;MQ=23.86;QD=3.87;SOR=3.160;FractionInformativeReads=0.955	GT:AD:AF:DP:F1R2:F2R1:GQ:PL:GP:PRI:SB:MB:PS	1|1:0,21:1.000:21:0,11:0,10:60:123,63,0:8.5213e+01,6.0213e+01,4.1418e-06:0.00,34.77,37.77:0,0,3,18:0,0,11,10:126379
ENA|KF241981|KF241981.1	126432	.	C	G	84.28	PASS	AC=2;AF=1.000;AN=2;DP=22;FS=0.000;MQ=23.86;QD=3.83;SOR=3.160;FractionInformativeReads=0.955	GT:AD:AF:DP:F1R2:F2R1:GQ:PL:GP:PRI:SB:MB:PS	1|1:0,21:1.000:21:0,11:0,10:59:122,62,0:8.4283e+01,5.9283e+01,5.1772e-06:0.00,34.77,37.77:0,0,3,18:0,0,11,10:126379
ENA|KF241981|KF241981.1	126435	.	G	A	85.21	PASS	AC=2;AF=1.000;AN=2;DP=22;FS=0.000;MQ=23.86;QD=3.87;SOR=3.160;FractionInformativeReads=0.955	GT:AD:AF:DP:F1R2:F2R1:GQ:PL:GP:PRI:SB:MB:PS	1|1:0,21:1.000:21:0,11:0,10:60:123,63,0:8.5208e+01,6.0208e+01,4.1418e-06:0.00,34.77,37.77:0,0,3,18:0,0,11,10:126379
ENA|KF241981|KF241981.1	126550	.	A	C	7.81	DRAGENSnpHardQUAL;LowDepth	AC=2;AF=1.000;AN=2;DP=1;FS=0.000;MQ=14.00;QD=7.81;SOR=1.609;FractionInformativeReads=1.000	GT:AD:AF:DP:F1R2:F2R1:GQ:PL:GP:PRI:SB:MB	1/1:0,1:1.000:1:0,0:0,1:2:42,3,0:7.8065e+00,3.8021e+00,3.7921e+00:0.00,34.77,37.77:0,0,0,1:0,0,1,0
ENA|KF241981|KF241981.1	126590	.	G	A	5.53	DRAGENSnpHardQUAL	AC=1;AF=0.500;AN=2;DP=2;FS=0.000;MQ=19.04;MQRankSum=0.804;QD=2.76;ReadPosRankSum=0.804;SOR=0.693;FractionInformativeReads=1.000;R2_5P_bias=-5.034	GT:AD:AF:DP:F1R2:F2R1:GQ:PL:GP:PRI:SB:MB:PS	0|1:1,1:0.500:2:0,1:1,0:5:39,0,14:5.5280e+00,1.5126e+00,1.8513e+01:0.00,34.77,37.77:0,1,0,1:1,0,0,1:126590
ENA|KF241981|KF241981.1	126593	.	A	G	16.19	PASS	AC=1;AF=0.500;AN=2;DP=7;FS=0.000;MQ=30.55;MQRankSum=0.736;QD=2.31;ReadPosRankSum=-0.736;SOR=1.179;FractionInformativeReads=0.429;R2_5P_bias=-4.350	GT:AD:AF:DP:F1R2:F2R1:GQ:PL:GP:PRI:SB:MB:PS	0|1:1,2:0.667:3:0,2:1,0:5:49,0,1:1.6187e+01,1.5930e+00,5.4822e+00:0.00,34.77,37.77:0,1,0,2:1,0,0,2:126590
ENA|KF241981|KF241981.1	126608	.	C	T	25.11	PASS	AC=1;AF=0.500;AN=2;DP=7;FS=0.000;MQ=30.55;MQRankSum=0.736;QD=3.59;ReadPosRankSum=-0.736;SOR=1.179;FractionInformativeReads=0.429;R2_5P_bias=-4.350	GT:AD:AF:DP:F1R2:F2R1:GQ:PL:GP:PRI:SB:MB:PS	0|1:1,2:0.667:3:0,2:1,0:16:60,0,13:2.5115e+01,1.1488e-01,1.6378e+01:0.00,34.77,37.77:0,1,0,2:1,0,0,2:126608
ENA|KF241981|KF241981.1	126611	.	T	C	11.36	PASS	AC=1;AF=0.500;AN=2;DP=7;FS=0.000;MQ=30.55;MQRankSum=0.736;QD=1.62;ReadPosRankSum=-0.736;SOR=1.179;FractionInformativeReads=0.429;R2_5P_bias=-4.350	GT:AD:AF:DP:F1R2:F2R1:GQ:PL:GP:PRI:SB:MB:PS	0|1:1,2:0.667:3:0,2:1,0:10:46,0,13:1.1362e+01,4.2600e-01,1.6914e+01:0.00,34.77,37.77:0,1,0,2:1,0,0,2:126608
ENA|KF241981|KF241981.1	126615	.	G	A	25.11	PASS	AC=1;AF=0.500;AN=2;DP=7;FS=0.000;MQ=30.55;MQRankSum=0.736;QD=3.59;ReadPosRankSum=-0.736;SOR=1.179;FractionInformativeReads=0.429;R2_5P_bias=-4.350	GT:AD:AF:DP:F1R2:F2R1:GQ:PL:GP:PRI:SB:MB:PS	0|1:1,2:0.667:3:0,2:1,0:16:60,0,13:2.5115e+01,1.1492e-01,1.6376e+01:0.00,34.77,37.77:0,1,0,2:1,0,0,2:126608
ENA|KF241981|KF241981.1	126639	.	C	G	32.59	PASS	AC=1;AF=0.500;AN=2;DP=7;FS=0.000;MQ=30.55;MQRankSum=0.742;QD=4.66;ReadPosRankSum=-0.742;SOR=2.584;FractionInformativeReads=1.000;R2_5P_bias=-6.835	GT:AD:AF:DP:F1R2:F2R1:GQ:PL:GP:PRI:SB:MB:PS	0|1:1,6:0.857:7:0,4:1,2:9:67,0,5:3.2595e+01,5.9489e-01,8.9463e+00:0.00,34.77,37.77:0,1,0,6:1,0,2,4:126639
ENA|KF241981|KF241981.1	126646	.	T	TATGAAA	32.36	PASS	AC=1;AF=0.500;AN=2;DP=7;FS=0.000;MQ=30.55;MQRankSum=0.736;QD=4.62;ReadPosRankSum=0.736;SOR=2.303;FractionInformativeReads=0.857;R2_5P_bias=-6.780	GT:AD:AF:DP:F1R2:F2R1:GQ:PL:GP:PRI:SB:MB:PS	0|1:1,5:0.833:6:0,3:1,2:11:70,0,8:3.2356e+01,3.5589e-01,1.1074e+01:0.00,38.00,41.00:0,1,0,5:1,0,2,3:126639
ENA|KF241981|KF241981.1	126648	.	T	TAAGTA	32.36	PASS	AC=1;AF=0.500;AN=2;DP=7;FS=0.000;MQ=30.55;MQRankSum=0.736;QD=4.62;ReadPosRankSum=0.736;SOR=2.303;FractionInformativeReads=0.857;R2_5P_bias=-6.780	GT:AD:AF:DP:F1R2:F2R1:GQ:PL:GP:PRI:SB:MB:PS	0|1:1,5:0.833:6:0,3:1,2:11:70,0,8:3.2359e+01,3.5894e-01,1.1038e+01:0.00,38.00,41.00:0,1,0,5:1,0,2,3:126639
ENA|KF241981|KF241981.1	126650	.	CGCG	C	32.36	PASS	AC=1;AF=0.500;AN=2;DP=7;FS=0.000;MQ=30.55;MQRankSum=0.736;QD=4.62;ReadPosRankSum=0.736;SOR=2.303;FractionInformativeReads=0.857;R2_5P_bias=-6.780	GT:AD:AF:DP:F1R2:F2R1:GQ:PL:GP:PRI:SB:MB:PS	0|1:1,5:0.833:6:0,3:1,2:11:70,0,8:3.2359e+01,3.5894e-01,1.1038e+01:0.00,38.00,41.00:0,1,0,5:1,0,2,3:126639
ENA|KF241981|KF241981.1	126654	.	T	A	32.36	PASS	AC=1;AF=0.500;AN=2;DP=7;FS=0.000;MQ=30.55;MQRankSum=0.736;QD=4.62;ReadPosRankSum=0.736;SOR=2.303;FractionInformativeReads=0.857;R2_5P_bias=-6.780	GT:AD:AF:DP:F1R2:F2R1:GQ:PL:GP:PRI:SB:MB:PS	0|1:1,5:0.833:6:0,3:1,2:11:67,0,8:3.2359e+01,3.5899e-01,1.1037e+01:0.00,34.77,37.77:0,1,0,5:1,0,2,3:126639
ENA|KF241981|KF241981.1	126659	.	GAGGGCACCCCTCTCT	G	32.36	PASS	AC=1;AF=0.500;AN=2;DP=7;FS=0.000;MQ=30.55;MQRankSum=0.736;QD=4.62;ReadPosRankSum=0.736;SOR=2.303;FractionInformativeReads=0.857;R2_5P_bias=-6.780	GT:AD:AF:DP:F1R2:F2R1:GQ:PL:GP:PRI:SB:MB:PS	0|1:1,5:0.833:6:0,3:1,2:11:70,0,8:3.2359e+01,3.5895e-01,1.1038e+01:0.00,38.00,41.00:0,1,0,5:1,0,2,3:126639
ENA|KF241981|KF241981.1	126677	.	C	A	44.31	PASS	AC=2;AF=1.000;AN=2;DP=6;FS=0.000;MQ=32.50;QD=7.39;SOR=3.611;FractionInformativeReads=0.833	GT:AD:AF:DP:F1R2:F2R1:GQ:PL:GP:PRI:SB:MB:PS	1|1:0,5:1.000:5:0,3:0,2:12:82,15,0:4.4314e+01,1.2314e+01,2.6289e-01:0.00,34.77,37.77:0,0,0,5:0,0,2,3:126639
ENA|KF241981|KF241981.1	126680	.	G	GAC	44.31	PASS	AC=2;AF=1.000;AN=2;DP=6;FS=0.000;MQ=32.50;QD=7.39;SOR=3.611;FractionInformativeReads=0.833	GT:AD:AF:DP:F1R2:F2R1:GQ:PL:GP:PRI:SB:MB:PS	1|1:0,5:1.000:5:0,3:0,2:12:85,15,0:4.4314e+01,1.2314e+01,2.6289e-01:0.00,38.00,41.00:0,0,0,5:0,0,2,3:126639
ENA|KF241981|KF241981.1	126684	.	A	T	44.31	PASS	AC=2;AF=1.000;AN=2;DP=6;FS=0.000;MQ=32.50;QD=7.39;SOR=3.611;FractionInformativeReads=0.833	GT:AD:AF:DP:F1R2:F2R1:GQ:PL:GP:PRI:SB:MB:PS	1|1:0,5:1.000:5:0,3:0,2:12:82,15,0:4.4314e+01,1.2314e+01,2.6289e-01:0.00,34.77,37.77:0,0,0,5:0,0,2,3:126639
ENA|KF241981|KF241981.1	126687	.	C	T	44.31	PASS	AC=2;AF=1.000;AN=2;DP=6;FS=0.000;MQ=32.50;QD=7.39;SOR=3.611;FractionInformativeReads=0.833	GT:AD:AF:DP:F1R2:F2R1:GQ:PL:GP:PRI:SB:MB:PS	1|1:0,5:1.000:5:0,3:0,2:12:82,15,0:4.4313e+01,1.2313e+01,2.6293e-01:0.00,34.77,37.77:0,0,0,5:0,0,2,3:126639
ENA|KF241981|KF241981.1	126689	.	C	T	44.31	PASS	AC=2;AF=1.000;AN=2;DP=6;FS=0.000;MQ=32.50;QD=7.39;SOR=3.611;FractionInformativeReads=0.833	GT:AD:AF:DP:F1R2:F2R1:GQ:PL:GP:PRI:SB:MB:PS	1|1:0,5:1.000:5:0,3:0,2:12:82,15,0:4.4314e+01,1.2314e+01,2.6289e-01:0.00,34.77,37.77:0,0,0,5:0,0,2,3:126639
ENA|KF241981|KF241981.1	126690	.	G	T	44.31	PASS	AC=2;AF=1.000;AN=2;DP=6;FS=0.000;MQ=32.50;QD=7.39;SOR=3.611;FractionInformativeReads=0.833	GT:AD:AF:DP:F1R2:F2R1:GQ:PL:GP:PRI:SB:MB:PS	1|1:0,5:1.000:5:0,3:0,2:12:82,15,0:4.4314e+01,1.2314e+01,2.6290e-01:0.00,34.77,37.77:0,0,0,5:0,0,2,3:126639
ENA|KF241981|KF241981.1	126691	.	G	GTT	44.31	PASS	AC=2;AF=1.000;AN=2;DP=6;FS=0.000;MQ=32.50;QD=7.39;SOR=3.611;FractionInformativeReads=0.833	GT:AD:AF:DP:F1R2:F2R1:GQ:PL:GP:PRI:SB:MB:PS	1|1:0,5:1.000:5:0,3:0,2:12:85,15,0:4.4314e+01,1.2314e+01,2.6289e-01:0.00,38.00,41.00:0,0,0,5:0,0,2,3:126639
ENA|KF241981|KF241981.1	126692	.	C	CAT	44.31	PASS	AC=2;AF=1.000;AN=2;DP=6;FS=0.000;MQ=32.50;QD=7.39;SOR=3.611;FractionInformativeReads=0.833	GT:AD:AF:DP:F1R2:F2R1:GQ:PL:GP:PRI:SB:MB:PS	1|1:0,5:1.000:5:0,3:0,2:12:85,15,0:4.4313e+01,1.2313e+01,2.6296e-01:0.00,38.00,41.00:0,0,0,5:0,0,2,3:126639
ENA|KF241981|KF241981.1	126701	.	C	G	44.31	PASS	AC=2;AF=1.000;AN=2;DP=6;FS=0.000;MQ=32.50;QD=7.39;SOR=3.611;FractionInformativeReads=0.833	GT:AD:AF:DP:F1R2:F2R1:GQ:PL:GP:PRI:SB:MB	1/1:0,5:1.000:5:0,3:0,2:12:82,15,0:4.4314e+01,1.2314e+01,2.6289e-01:0.00,34.77,37.77:0,0,0,5:0,0,2,3
ENA|KF241981|KF241981.1	126702	.	C	G	44.31	PASS	AC=2;AF=1.000;AN=2;DP=6;FS=0.000;MQ=32.50;QD=7.39;SOR=3.611;FractionInformativeReads=0.833	GT:AD:AF:DP:F1R2:F2R1:GQ:PL:GP:PRI:SB:MB:PS	1|1:0,5:1.000:5:0,3:0,2:12:82,15,0:4.4314e+01,1.2314e+01,2.6289e-01:0.00,34.77,37.77:0,0,0,5:0,0,2,3:126639
ENA|KF241981|KF241981.1	126714	.	C	T	44.31	PASS	AC=2;AF=1.000;AN=2;DP=6;FS=0.000;MQ=32.50;QD=7.39;SOR=3.611;FractionInformativeReads=0.833	GT:AD:AF:DP:F1R2:F2R1:GQ:PL:GP:PRI:SB:MB:PS	1|1:0,5:1.000:5:0,3:0,2:12:82,15,0:4.4313e+01,1.2313e+01,2.6293e-01:0.00,34.77,37.77:0,0,0,5:0,0,2,3:126714
ENA|KF241981|KF241981.1	126716	.	T	G	44.31	PASS	AC=2;AF=1.000;AN=2;DP=6;FS=0.000;MQ=32.50;QD=7.39;SOR=3.611;FractionInformativeReads=0.833	GT:AD:AF:DP:F1R2:F2R1:GQ:PL:GP:PRI:SB:MB:PS	1|1:0,5:1.000:5:0,3:0,2:12:82,15,0:4.4314e+01,1.2314e+01,2.6289e-01:0.00,34.77,37.77:0,0,0,5:0,0,2,3:126714
ENA|KF241981|KF241981.1	126720	.	T	G	44.31	PASS	AC=2;AF=1.000;AN=2;DP=6;FS=0.000;MQ=32.50;QD=7.39;SOR=3.611;FractionInformativeReads=0.833	GT:AD:AF:DP:F1R2:F2R1:GQ:PL:GP:PRI:SB:MB	1/1:0,5:1.000:5:0,3:0,2:12:82,15,0:4.4314e+01,1.2314e+01,2.6289e-01:0.00,34.77,37.77:0,0,0,5:0,0,2,3
ENA|KF241981|KF241981.1	126724	.	C	T	44.31	PASS	AC=2;AF=1.000;AN=2;DP=6;FS=0.000;MQ=32.50;QD=7.39;SOR=3.611;FractionInformativeReads=0.833	GT:AD:AF:DP:F1R2:F2R1:GQ:PL:GP:PRI:SB:MB:PS	1|1:0,5:1.000:5:0,3:0,2:12:82,15,0:4.4314e+01,1.2314e+01,2.6289e-01:0.00,34.77,37.77:0,0,0,5:0,0,2,3:126714
ENA|KF241981|KF241981.1	133483	.	C	T	7.8	DRAGENSnpHardQUAL;LowDepth	AC=2;AF=1.000;AN=2;DP=1;FS=0.000;MQ=4.00;QD=7.80;SOR=1.609;FractionInformativeReads=1.000	GT:AD:AF:DP:F1R2:F2R1:GQ:PL:GP:PRI:SB:MB	1/1:0,1:1.000:1:0,1:0,0:2:42,3,0:7.8029e+00,3.8029e+00,3.7928e+00:0.00,34.77,37.77:0,0,1,0:0,0,1,0

## Sheet: Leaves_dark #2
VCF Metadata of sample #4 - Leaves_dark #2
##fileformat=VCFv4.2
##FORMAT=<ID=AD,Number=R,Type=Integer,Description="Allelic depths (counting only informative reads out of the total reads) for the ref and alt alleles in the order listed">
##FORMAT=<ID=AF,Number=A,Type=Float,Description="Allele fractions for alt alleles in the order listed">
##FORMAT=<ID=DP,Number=1,Type=Integer,Description="Approximate read depth (reads with MQ=255 or with bad mates are filtered)">
##FORMAT=<ID=F1R2,Number=R,Type=Integer,Description="Count of reads in F1R2 pair orientation supporting each allele">
##FORMAT=<ID=F2R1,Number=R,Type=Integer,Description="Count of reads in F2R1 pair orientation supporting each allele">
##FORMAT=<ID=GP,Number=G,Type=Float,Description="Phred-scaled posterior probabilities for genotypes as defined in the VCF specification">
##FORMAT=<ID=GQ,Number=1,Type=Integer,Description="Genotype Quality">
##FORMAT=<ID=GT,Number=1,Type=String,Description="Genotype">
##FORMAT=<ID=MB,Number=4,Type=Integer,Description="Per-sample component statistics to detect mate bias">
##FORMAT=<ID=PL,Number=G,Type=Integer,Description="Normalized, Phred-scaled likelihoods for genotypes as defined in the VCF specification">
##FORMAT=<ID=PRI,Number=G,Type=Float,Description="Phred-scaled prior probabilities for genotypes">
##FORMAT=<ID=PS,Number=1,Type=Integer,Description="Physical phasing ID information, where each unique ID within a given sample (but not across samples) connects records within a phasing group">
##FORMAT=<ID=SB,Number=4,Type=Integer,Description="Per-sample component statistics which comprise the Fisher's Exact Test to detect strand bias">
##DRAGENCommandLine=<ID=HashTableBuild,Version="SW: 01.003.044.3.8.4, HashTableVersion: 8",CommandLineOptions="/opt/edico/bin/dragen --lic-instance-id-location /root/.edico --build-hash-table true --ht-reference /data/input/appresults/156901751/Ref_Zm Cp_KF241981.fasta --ht-alt-aware-validate true --output-directory /data/scratch/Ref_Zm_Cp_KF241981">
##DRAGENCommandLine=<ID=dragen,Version="SW: 05.021.602.3.8.4, HW: 05.021.602",Date="Wed Jun 23 00:36:53 UTC 2021",CommandLineOptions="--lic-server https://XXXXXXXXXXXX:YYYYYYYYYYYYYYYYYYYYYYYYYYYYYYYY@license.edicogenome.com --lic-instance-id-location /root/.edico --output_status_file /data/scratch/progress.log --enable-duplicate-marking true --enable-map-align true --enable-map-align-output true…
##INFO=<ID=AC,Number=A,Type=Integer,Description="Allele count in genotypes, for each ALT allele, in the same order as listed">
##INFO=<ID=AF,Number=A,Type=Float,Description="Allele Frequency, for each ALT allele, in the same order as listed">
##INFO=<ID=AN,Number=1,Type=Integer,Description="Total number of alleles in called genotypes">
##INFO=<ID=DB,Number=0,Type=Flag,Description="dbSNP Membership">
##INFO=<ID=DP,Number=1,Type=Integer,Description="Approximate read depth (informative and non-informative); some reads may have been filtered based on mapq etc.">
##INFO=<ID=END,Number=1,Type=Integer,Description="Stop position of the interval">
##INFO=<ID=FS,Number=1,Type=Float,Description="Phred-scaled p-value using Fisher's exact test to detect strand bias">
##INFO=<ID=FractionInformativeReads,Number=1,Type=Float,Description="The fraction of informative reads out of the total reads">
##INFO=<ID=MQ,Number=1,Type=Float,Description="RMS Mapping Quality">
##INFO=<ID=MQRankSum,Number=1,Type=Float,Description="Z-score From Wilcoxon rank sum test of Alt vs. Ref read mapping qualities">
##INFO=<ID=QD,Number=1,Type=Float,Description="Variant Confidence/Quality by Depth">
##INFO=<ID=R2_5P_bias,Number=1,Type=Float,Description="Score based on mate bias and distance from 5 prime end">
##INFO=<ID=ReadPosRankSum,Number=1,Type=Float,Description="Z-score from Wilcoxon rank sum test of Alt vs. Ref read position bias">
##INFO=<ID=SOR,Number=1,Type=Float,Description="Symmetric Odds Ratio of 2x2 contingency table to detect strand bias">
##FILTER=<ID=DRAGENSnpHardQUAL,Description="Set if true:QUAL < 10.41">
##FILTER=<ID=DRAGENIndelHardQUAL,Description="Set if true:QUAL < 7.83">
##FILTER=<ID=LowDepth,Description="Set if true:DP <= 1">
##FILTER=<ID=LowGQ,Description="Set if true:GQ = 0">
##FILTER=<ID=PloidyConflict,Description="Genotype call from variant caller not consistent with chromosome ploidy">
##FILTER=<ID=RMxNRepeatRegion,Description="Site filtered because all or part of the variant allele is a repeat of the reference">
##contig=<ID=ENA|KF241981|KF241981.1,length=140447>
##reference=file:///data/scratch/Ref_Zm_Cp_KF241981.v8/254780843/reference.bin
#CHROM	POS	ID	REF	ALT	QUAL	FILTER	INFO	FORMAT	302335
ENA|KF241981|KF241981.1	3242	.	GC	G	406.38	PASS	AC=2;AF=1.000;AN=2;DP=153;FS=0.000;MQ=244.69;MQRankSum=1.494;QD=2.66;ReadPosRankSum=1.600;SOR=1.259;FractionInformativeReads=0.856;R2_5P_bias=0.000	GT:AD:AF:DP:F1R2:F2R1:GQ:PL:GP:PRI:SB:MB	1/1:1,130:0.992:131:0,50:1,80:356:447,359,0:4.0638e+02,3.5638e+02,0.0000e+00:0.00,38.00,41.00:1,0,46,84:0,1,70,60
ENA|KF241981|KF241981.1	3754	.	T	TAA	360.28	PASS	AC=2;AF=1.000;AN=2;DP=126;FS=0.000;MQ=246.06;QD=2.86;SOR=1.136;FractionInformativeReads=0.841	GT:AD:AF:DP:F1R2:F2R1:GQ:PL:GP:PRI:SB:MB	1/1:0,106:1.000:106:0,50:0,56:310:370,313,0:3.6028e+02,3.1028e+02,0.0000e+00:0.00,7.00,10.00:0,0,43,63:0,0,55,51
ENA|KF241981|KF241981.1	12961	.	A	ATTTTTT,ATTTTTTT	454.81	PASS	AC=1,1;AF=0.500,0.500;AN=2;DP=144;FS=0.000;MQ=239.02;QD=3.16;SOR=1.630;FractionInformativeReads=0.785	GT:AD:AF:DP:F1R2:F2R1:GQ:PL:GP:PRI:SB:MB	1/2:0,80,33:0.708,0.292:113:0,50,17:0,30,16:45:467,411,48,612,0,56:4.5000e+02,4.0481e+02,4.5379e+01,4.5000e+02,1.4755e-04,5.3000e+01:0.00,6.00,9.00,6.00,12.00,9.00:0,0,37,76:0,0,55,58
ENA|KF241981|KF241981.1	96049	.	G	T	10.44	LowDepth	AC=2;AF=1.000;AN=2;DP=1;FS=0.000;MQ=27.00;QD=10.44;SOR=1.609;FractionInformativeReads=1.000	GT:AD:AF:DP:F1R2:F2R1:GQ:PL:GP:PRI:SB:MB	1/1:0,1:1.000:1:0,1:0,0:3:45,3,0:1.0441e+01,3.4266e+00,3.4165e+00:0.00,34.77,37.77:0,0,1,0:0,0,1,0
ENA|KF241981|KF241981.1	96098	.	T	A	33.02	PASS	AC=2;AF=1.000;AN=2;DP=4;FS=0.000;MQ=27.00;QD=8.26;SOR=3.258;FractionInformativeReads=1.000	GT:AD:AF:DP:F1R2:F2R1:GQ:PL:GP:PRI:SB:MB:PS	1|1:0,4:1.000:4:0,4:0,0:6:70,8,0:3.3023e+01,6.0230e+00,1.2515e+00:0.00,34.77,37.78:0,0,4,0:0,0,4,0:96098
ENA|KF241981|KF241981.1	96103	.	A	C	33.02	PASS	AC=2;AF=1.000;AN=2;DP=4;FS=0.000;MQ=27.00;QD=8.26;SOR=3.258;FractionInformativeReads=1.000	GT:AD:AF:DP:F1R2:F2R1:GQ:PL:GP:PRI:SB:MB:PS	1|1:0,4:1.000:4:0,4:0,0:6:70,8,0:3.3023e+01,6.0230e+00,1.2515e+00:0.00,34.77,37.78:0,0,4,0:0,0,4,0:96098
ENA|KF241981|KF241981.1	96122	.	G	C	39.31	PASS	AC=2;AF=1.000;AN=2;DP=5;FS=0.000;MQ=27.00;QD=7.86;SOR=3.611;FractionInformativeReads=1.000	GT:AD:AF:DP:F1R2:F2R1:GQ:PL:GP:PRI:SB:MB	1/1:0,5:1.000:5:0,5:0,0:12:77,15,0:3.9313e+01,1.2313e+01,2.6329e-01:0.00,34.77,37.77:0,0,5,0:0,0,5,0
ENA|KF241981|KF241981.1	96138	.	A	ACTT	35.12	PASS	AC=2;AF=1.000;AN=2;DP=7;FS=0.000;MQ=27.00;QD=5.02;SOR=3.611;FractionInformativeReads=0.714	GT:AD:AF:DP:F1R2:F2R1:GQ:PL:GP:PRI:SB:MB	1/1:0,5:1.000:5:0,5:0,0:8:76,10,0:3.5119e+01,8.1187e+00,7.2899e-01:0.00,39.00,42.01:0,0,5,0:0,0,5,0
ENA|KF241981|KF241981.1	96141	.	CTCTTGAA	C	35.04	PASS	AC=2;AF=1.000;AN=2;DP=7;FS=0.000;MQ=27.00;MQRankSum=1.495;QD=5.01;ReadPosRankSum=-0.922;SOR=1.609;FractionInformativeReads=1.000;R2_5P_bias=0.000	GT:AD:AF:DP:F1R2:F2R1:GQ:PL:GP:PRI:SB:MB	1/1:2,5:0.714:7:2,5:0,0:8:76,10,0:3.5041e+01,8.0416e+00,7.4322e-01:0.00,39.00,42.01:2,0,5,0:2,0,5,0
ENA|KF241981|KF241981.1	96148	.	A	ACTTTCC	24.42	PASS	AC=1;AF=0.500;AN=2;DP=7;FS=0.000;MQ=27.00;MQRankSum=1.495;QD=3.49;ReadPosRankSum=0.198;SOR=0.223;FractionInformativeReads=1.000;R2_5P_bias=-8.506	GT:AD:AF:DP:F1R2:F2R1:GQ:PL:GP:PRI:SB:MB	0/1:5,2:0.286:7:5,2:0,0:23:53,0,24:2.4420e+01,2.4383e-02,2.7024e+01:0.00,29.00,32.01:5,0,2,0:5,0,2,0
ENA|KF241981|KF241981.1	96153	.	A	AT	69.67	PASS	AC=2;AF=1.000;AN=2;DP=7;FS=0.000;MQ=27.00;QD=9.95;SOR=4.174;FractionInformativeReads=1.000	GT:AD:AF:DP:F1R2:F2R1:GQ:PL:GP:PRI:SB:MB:PS	1|1:0,7:1.000:7:0,7:0,0:43:108,46,0:6.9668e+01,4.2668e+01,2.3531e-04:0.00,35.00,38.01:0,0,7,0:0,0,7,0:96153
ENA|KF241981|KF241981.1	96155	.	G	GATT	69.67	PASS	AC=2;AF=1.000;AN=2;DP=7;FS=0.000;MQ=27.00;QD=9.95;SOR=4.174;FractionInformativeReads=1.000	GT:AD:AF:DP:F1R2:F2R1:GQ:PL:GP:PRI:SB:MB:PS	1|1:0,7:1.000:7:0,7:0,0:43:108,46,0:6.9670e+01,4.2670e+01,2.3531e-04:0.00,35.00,38.01:0,0,7,0:0,0,7,0:96153
ENA|KF241981|KF241981.1	96162	.	C	T	69.67	PASS	AC=2;AF=1.000;AN=2;DP=7;FS=0.000;MQ=27.00;QD=9.95;SOR=4.174;FractionInformativeReads=1.000	GT:AD:AF:DP:F1R2:F2R1:GQ:PL:GP:PRI:SB:MB:PS	1|1:0,7:1.000:7:0,7:0,0:43:107,46,0:6.9670e+01,4.2670e+01,2.3531e-04:0.00,34.77,37.78:0,0,7,0:0,0,7,0:96153
ENA|KF241981|KF241981.1	96171	.	G	T	35.24	PASS	AC=2;AF=1.000;AN=2;DP=7;FS=0.000;MQ=27.00;MQRankSum=1.495;QD=5.03;ReadPosRankSum=1.495;SOR=1.609;FractionInformativeReads=1.000;R2_5P_bias=0.000	GT:AD:AF:DP:F1R2:F2R1:GQ:PL:GP:PRI:SB:MB	1/1:2,5:0.714:7:2,5:0,0:8:72,11,0:3.5237e+01,8.2369e+00,7.0773e-01:0.00,34.77,37.78:2,0,5,0:2,0,5,0
ENA|KF241981|KF241981.1	96173	.	G	T	35.24	PASS	AC=2;AF=1.000;AN=2;DP=7;FS=0.000;MQ=27.00;QD=5.03;SOR=4.174;FractionInformativeReads=1.000	GT:AD:AF:DP:F1R2:F2R1:GQ:PL:GP:PRI:SB:MB:PS	1|1:0,7:1.000:7:0,7:0,0:8:72,11,0:3.5238e+01,8.2385e+00,7.0745e-01:0.00,34.77,37.78:0,0,7,0:0,0,7,0:96153
ENA|KF241981|KF241981.1	96184	.	G	C	45.14	PASS	AC=2;AF=1.000;AN=2;DP=7;FS=0.000;MQ=27.00;QD=6.45;SOR=4.174;FractionInformativeReads=1.000	GT:AD:AF:DP:F1R2:F2R1:GQ:PL:GP:PRI:SB:MB	1/1:0,7:1.000:7:0,7:0,0:18:83,21,0:4.5138e+01,1.8138e+01,6.7324e-02:0.00,34.77,37.77:0,0,7,0:0,0,7,0
ENA|KF241981|KF241981.1	96208	.	C	T	32.09	PASS	AC=2;AF=1.000;AN=2;DP=4;FS=0.000;MQ=27.00;QD=8.02;SOR=3.258;FractionInformativeReads=1.000	GT:AD:AF:DP:F1R2:F2R1:GQ:PL:GP:PRI:SB:MB:PS	1|1:0,4:1.000:4:0,4:0,0:5:68,6,0:3.2086e+01,5.0855e+00,1.6158e+00:0.00,34.77,37.78:0,0,4,0:0,0,4,0:96208
ENA|KF241981|KF241981.1	96212	.	A	G	32.09	PASS	AC=2;AF=1.000;AN=2;DP=4;FS=0.000;MQ=27.00;QD=8.02;SOR=3.258;FractionInformativeReads=1.000	GT:AD:AF:DP:F1R2:F2R1:GQ:PL:GP:PRI:SB:MB:PS	1|1:0,4:1.000:4:0,4:0,0:5:68,6,0:3.2085e+01,5.0854e+00,1.6159e+00:0.00,34.77,37.78:0,0,4,0:0,0,4,0:96208
ENA|KF241981|KF241981.1	96215	.	G	A	32.09	PASS	AC=2;AF=1.000;AN=2;DP=5;FS=0.000;MQ=27.00;QD=6.42;SOR=1.981;FractionInformativeReads=1.000	GT:AD:AF:DP:F1R2:F2R1:GQ:PL:GP:PRI:SB:MB:PS	1|1:0,5:1.000:5:0,5:0,0:5:68,6,0:3.2085e+01,5.0851e+00,1.6160e+00:0.00,34.77,37.78:0,0,4,1:0,0,4,1:96208
ENA|KF241981|KF241981.1	96230	.	T	C	35.24	PASS	AC=2;AF=1.000;AN=2;DP=5;FS=0.000;MQ=27.00;QD=7.05;SOR=1.981;FractionInformativeReads=1.000	GT:AD:AF:DP:F1R2:F2R1:GQ:PL:GP:PRI:SB:MB:PS	1|1:0,5:1.000:5:0,5:0,0:8:72,11,0:3.5240e+01,8.2403e+00,7.0712e-01:0.00,34.77,37.78:0,0,1,4:0,0,1,4:96230
ENA|KF241981|KF241981.1	96233	.	C	T	35.24	PASS	AC=2;AF=1.000;AN=2;DP=5;FS=0.000;MQ=27.00;QD=7.05;SOR=1.981;FractionInformativeReads=1.000	GT:AD:AF:DP:F1R2:F2R1:GQ:PL:GP:PRI:SB:MB:PS	1|1:0,5:1.000:5:0,5:0,0:8:72,11,0:3.5239e+01,8.2393e+00,7.0730e-01:0.00,34.77,37.78:0,0,1,4:0,0,1,4:96230
ENA|KF241981|KF241981.1	96248	.	TCG	T	39.31	PASS	AC=2;AF=1.000;AN=2;DP=5;FS=0.000;MQ=27.00;QD=7.86;SOR=3.611;FractionInformativeReads=1.000	GT:AD:AF:DP:F1R2:F2R1:GQ:PL:GP:PRI:SB:MB	1/1:0,5:1.000:5:0,5:0,0:12:80,15,0:3.9314e+01,1.2314e+01,2.6323e-01:0.00,38.00,41.00:0,0,0,5:0,0,0,5
ENA|KF241981|KF241981.1	100864	.	A	ACC	6.2	DRAGENIndelHardQUAL;LowDepth	AC=2;AF=1.000;AN=2;DP=1;FS=0.000;MQ=2.00;QD=6.20;SOR=1.609;FractionInformativeReads=1.000	GT:AD:AF:DP:F1R2:F2R1:GQ:PL:GP:PRI:SB:MB	1/1:0,1:1.000:1:0,1:0,0:2:43,3,0:6.2050e+00,4.2050e+00,4.1949e+00:0.00,38.00,41.00:0,0,0,1:0,0,0,1
ENA|KF241981|KF241981.1	126175	.	A	C	29.78	PASS	AC=2;AF=1.000;AN=2;DP=2;FS=0.000;MQ=25.00;QD=14.89;SOR=2.303;FractionInformativeReads=1.000	GT:AD:AF:DP:F1R2:F2R1:GQ:PL:GP:PRI:SB:MB:PS	1|1:0,2:1.000:2:0,1:0,1:5:66,6,0:2.9782e+01,4.7816e+00,1.7626e+00:0.00,34.77,37.77:0,0,2,0:0,0,1,1:126175
ENA|KF241981|KF241981.1	126176	.	G	C	29.78	PASS	AC=2;AF=1.000;AN=2;DP=2;FS=0.000;MQ=25.00;QD=14.89;SOR=2.303;FractionInformativeReads=1.000	GT:AD:AF:DP:F1R2:F2R1:GQ:PL:GP:PRI:SB:MB:PS	1|1:0,2:1.000:2:0,1:0,1:5:66,6,0:2.9782e+01,4.7821e+00,1.7623e+00:0.00,34.77,37.77:0,0,2,0:0,0,1,1:126175
ENA|KF241981|KF241981.1	126202	.	T	C	29.78	PASS	AC=2;AF=1.000;AN=2;DP=2;FS=0.000;MQ=25.00;QD=14.89;SOR=2.303;FractionInformativeReads=1.000	GT:AD:AF:DP:F1R2:F2R1:GQ:PL:GP:PRI:SB:MB:PS	1|1:0,2:1.000:2:0,1:0,1:5:66,6,0:2.9782e+01,4.7825e+00,1.7621e+00:0.00,34.77,37.77:0,0,2,0:0,0,1,1:126202
ENA|KF241981|KF241981.1	126208	.	C	CAT	29.78	PASS	AC=2;AF=1.000;AN=2;DP=2;FS=0.000;MQ=25.00;QD=14.89;SOR=2.303;FractionInformativeReads=1.000	GT:AD:AF:DP:F1R2:F2R1:GQ:PL:GP:PRI:SB:MB:PS	1|1:0,2:1.000:2:0,1:0,1:5:69,6,0:2.9782e+01,4.7825e+00,1.7621e+00:0.00,38.00,41.00:0,0,2,0:0,0,1,1:126202
ENA|KF241981|KF241981.1	126209	.	GC	G,GAATCAC	9.49	PASS	AC=1,1;AF=0.500,0.500;AN=2;DP=2;FS=0.000;MQ=25.00;QD=4.74;SOR=2.303;FractionInformativeReads=1.000	GT:AD:AF:DP:F1R2:F2R1:GQ:PL:GP:PRI:SB:MB	1/2:0,1,1:0.500,0.500:2:0,0,1:0,1,0:1:79,42,39,38,0,36:9.4880e+00,1.0022e+01,1.0012e+01,6.1985e+00,6.1022e+00,6.9259e+00:0.00,38.00,41.00,38.00,76.00,41.00:0,0,2,0:0,0,1,1
ENA|KF241981|KF241981.1	126211	.	AAG	A	11.28	PASS	AC=1;AF=0.500;AN=2;DP=2;FS=0.000;MQ=25.00;MQRankSum=0.804;QD=5.64;ReadPosRankSum=0.804;SOR=0.693;FractionInformativeReads=1.000;R2_5P_bias=-8.044	GT:AD:AF:DP:F1R2:F2R1:GQ:PL:GP:PRI:SB:MB:PS	0|1:1,1:0.500:2:0,1:1,0:11:39,0,25:1.1276e+01,3.4329e-01,2.8343e+01:0.00,28.00,31.00:1,0,1,0:0,1,1,0:126211
ENA|KF241981|KF241981.1	126213	.	G	T	3.14	DRAGENSnpHardQUAL	AC=1;AF=0.500;AN=2;DP=2;FS=0.000;MQ=25.00;MQRankSum=0.804;QD=1.57;ReadPosRankSum=0.804;SOR=0.693;FractionInformativeReads=1.000;R2_5P_bias=-5.034	GT:AD:AF:DP:F1R2:F2R1:GQ:PL:GP:PRI:SB:MB:PS	0|1:1,1:0.500:2:1,0:0,1:3:35,0,25:3.1399e+00,2.8914e+00,3.0891e+01:0.00,34.77,37.77:1,0,1,0:1,0,0,1:126213
ENA|KF241981|KF241981.1	126215	.	C	CGTGG,A	14.48	PASS	AC=1,1;AF=0.500,0.500;AN=2;DP=2;FS=0.000;MQ=25.00;QD=7.24;SOR=2.303;FractionInformativeReads=1.000	GT:AD:AF:DP:F1R2:F2R1:GQ:PL:GP:PRI:SB:MB	1/2:0,1,1:0.500,0.500:2:0,1,0:0,0,1:2:83,40,36,42,0,39:1.4485e+01,9.2302e+00,8.2003e+00,8.0900e+00,4.1701e+00,8.0799e+00:0.00,38.00,41.00,34.77,72.77,37.77:0,0,2,0:0,0,1,1
ENA|KF241981|KF241981.1	126216	.	T	C	3.53	DRAGENSnpHardQUAL	AC=1;AF=0.500;AN=2;DP=2;FS=0.000;MQ=25.00;MQRankSum=0.804;QD=1.77;ReadPosRankSum=0.804;SOR=0.693;FractionInformativeReads=1.000;R2_5P_bias=-5.034	GT:AD:AF:DP:F1R2:F2R1:GQ:PL:GP:PRI:SB:MB:PS	0|1:1,1:0.500:2:1,0:0,1:4:36,0,25:3.5338e+00,2.5500e+00,3.0550e+01:0.00,34.77,37.77:1,0,1,0:1,0,0,1:126213
ENA|KF241981|KF241981.1	126220	.	CTTA	C	25.02	PASS	AC=1;AF=0.500;AN=2;DP=4;FS=0.000;MQ=25.00;MQRankSum=1.026;QD=6.26;ReadPosRankSum=0.000;SOR=0.693;FractionInformativeReads=1.000;R2_5P_bias=-0.000	GT:AD:AF:DP:F1R2:F2R1:GQ:PL:GP:PRI:SB:MB:PS	0|1:2,2:0.500:4:0,2:2,0:23:63,0,25:2.5021e+01,2.0568e-02,2.8021e+01:0.00,38.00,41.00:2,0,2,0:0,2,2,0:126211
ENA|KF241981|KF241981.1	126221	.	T	G	3.53	DRAGENSnpHardQUAL	AC=1;AF=0.500;AN=2;DP=2;FS=0.000;MQ=25.00;MQRankSum=0.804;QD=1.77;ReadPosRankSum=0.804;SOR=0.693;FractionInformativeReads=1.000;R2_5P_bias=-5.034	GT:AD:AF:DP:F1R2:F2R1:GQ:PL:GP:PRI:SB:MB:PS	0|1:1,1:0.500:2:1,0:0,1:4:36,0,25:3.5337e+00,2.5501e+00,3.0550e+01:0.00,34.77,37.77:1,0,1,0:1,0,0,1:126213
ENA|KF241981|KF241981.1	126222	.	TA	T	25.02	PASS	AC=1;AF=0.500;AN=2;DP=4;FS=0.000;MQ=25.00;MQRankSum=1.026;QD=6.26;ReadPosRankSum=1.026;SOR=0.693;FractionInformativeReads=1.000;R2_5P_bias=-4.239	GT:AD:AF:DP:F1R2:F2R1:GQ:PL:GP:PRI:SB:MB:PS	0|1:2,2:0.500:4:2,0:0,2:23:63,0,25:2.5021e+01,2.0568e-02,2.8021e+01:0.00,38.00,41.00:2,0,2,0:2,0,0,2:126213
ENA|KF241981|KF241981.1	126224	.	GGCA	G	25.02	PASS	AC=1;AF=0.500;AN=2;DP=4;FS=0.000;MQ=25.00;MQRankSum=1.026;QD=6.26;ReadPosRankSum=0.000;SOR=0.693;FractionInformativeReads=1.000;R2_5P_bias=-0.000	GT:AD:AF:DP:F1R2:F2R1:GQ:PL:GP:PRI:SB:MB:PS	0|1:2,2:0.500:4:0,2:2,0:23:63,0,25:2.5021e+01,2.0568e-02,2.8021e+01:0.00,38.00,41.00:2,0,2,0:0,2,2,0:126211
ENA|KF241981|KF241981.1	126226	.	C	T	25.02	PASS	AC=1;AF=0.500;AN=2;DP=4;FS=0.000;MQ=25.00;MQRankSum=1.026;QD=6.26;ReadPosRankSum=1.026;SOR=0.693;FractionInformativeReads=1.000;R2_5P_bias=-4.239	GT:AD:AF:DP:F1R2:F2R1:GQ:PL:GP:PRI:SB:MB:PS	0|1:2,2:0.500:4:2,0:0,2:23:60,0,25:2.5021e+01,2.0568e-02,2.8021e+01:0.00,34.77,37.77:2,0,2,0:2,0,0,2:126213
ENA|KF241981|KF241981.1	126228	.	T	A	25.02	PASS	AC=1;AF=0.500;AN=2;DP=4;FS=0.000;MQ=25.00;MQRankSum=1.026;QD=6.26;ReadPosRankSum=1.026;SOR=0.693;FractionInformativeReads=1.000;R2_5P_bias=-4.239	GT:AD:AF:DP:F1R2:F2R1:GQ:PL:GP:PRI:SB:MB:PS	0|1:2,2:0.500:4:2,0:0,2:23:60,0,25:2.5021e+01,2.0568e-02,2.8021e+01:0.00,34.77,37.77:2,0,2,0:2,0,0,2:126213
ENA|KF241981|KF241981.1	126230	.	C	CG	25.02	PASS	AC=1;AF=0.500;AN=2;DP=4;FS=0.000;MQ=25.00;MQRankSum=1.026;QD=6.26;ReadPosRankSum=0.000;SOR=0.693;FractionInformativeReads=1.000;R2_5P_bias=-4.239	GT:AD:AF:DP:F1R2:F2R1:GQ:PL:GP:PRI:SB:MB:PS	0|1:2,2:0.500:4:2,0:0,2:23:56,0,25:2.5021e+01,2.0568e-02,2.8021e+01:0.00,31.00,34.00:2,0,2,0:2,0,0,2:126213
ENA|KF241981|KF241981.1	126231	.	C	T	25.02	PASS	AC=1;AF=0.500;AN=2;DP=4;FS=0.000;MQ=25.00;MQRankSum=1.026;QD=6.26;ReadPosRankSum=0.000;SOR=0.693;FractionInformativeReads=1.000;R2_5P_bias=-4.239	GT:AD:AF:DP:F1R2:F2R1:GQ:PL:GP:PRI:SB:MB:PS	0|1:2,2:0.500:4:2,0:0,2:23:60,0,25:2.5021e+01,2.0568e-02,2.8021e+01:0.00,34.77,37.77:2,0,2,0:2,0,0,2:126213
ENA|KF241981|KF241981.1	126233	.	CTCCTTA	C	25.02	PASS	AC=1;AF=0.500;AN=2;DP=5;FS=0.000;MQ=25.00;MQRankSum=1.026;QD=5.00;ReadPosRankSum=1.026;SOR=0.693;FractionInformativeReads=0.800;R2_5P_bias=-0.000	GT:AD:AF:DP:F1R2:F2R1:GQ:PL:GP:PRI:SB:MB:PS	0|1:2,2:0.500:4:0,2:2,0:23:63,0,25:2.5021e+01,2.0568e-02,2.8021e+01:0.00,38.00,41.00:2,0,2,0:0,2,2,0:126211
ENA|KF241981|KF241981.1	126236	.	CTTA	C	25.02	PASS	AC=1;AF=0.500;AN=2;DP=5;FS=0.000;MQ=25.00;MQRankSum=1.026;QD=5.00;ReadPosRankSum=0.000;SOR=0.693;FractionInformativeReads=0.800;R2_5P_bias=-4.239	GT:AD:AF:DP:F1R2:F2R1:GQ:PL:GP:PRI:SB:MB:PS	0|1:2,2:0.500:4:2,0:0,2:23:63,0,25:2.5021e+01,2.0568e-02,2.8021e+01:0.00,38.00,41.00:2,0,2,0:2,0,0,2:126213
ENA|KF241981|KF241981.1	126241	.	GGTT	G	37.33	PASS	AC=2;AF=1.000;AN=2;DP=6;FS=0.000;MQ=25.00;QD=6.22;SOR=3.611;FractionInformativeReads=0.833	GT:AD:AF:DP:F1R2:F2R1:GQ:PL:GP:PRI:SB:MB:PS	1|1:0,5:1.000:5:0,3:0,2:12:78,15,0:3.7330e+01,1.2330e+01,2.6255e-01:0.00,38.00,41.00:0,0,5,0:0,0,3,2:126202
ENA|KF241981|KF241981.1	126249	.	G	T	40.19	PASS	AC=2;AF=1.000;AN=2;DP=7;FS=0.000;MQ=25.00;QD=5.74;SOR=3.912;FractionInformativeReads=0.857	GT:AD:AF:DP:F1R2:F2R1:GQ:PL:GP:PRI:SB:MB:PS	1|1:0,6:1.000:6:0,4:0,2:15:78,18,0:4.0194e+01,1.5194e+01,1.3378e-01:0.00,34.77,37.77:0,0,6,0:0,0,4,2:126202
ENA|KF241981|KF241981.1	126251	.	AAT	A	43.15	PASS	AC=2;AF=1.000;AN=2;DP=8;FS=0.000;MQ=25.00;QD=5.39;SOR=4.174;FractionInformativeReads=0.875	GT:AD:AF:DP:F1R2:F2R1:GQ:PL:GP:PRI:SB:MB:PS	1|1:0,7:1.000:7:0,5:0,2:18:84,21,0:4.3149e+01,1.8149e+01,6.7244e-02:0.00,38.00,41.00:0,0,7,0:0,0,5,2:126202
ENA|KF241981|KF241981.1	126257	.	TTCA	T	43.17	PASS	AC=2;AF=1.000;AN=2;DP=9;FS=0.000;MQ=25.00;QD=4.80;SOR=4.174;FractionInformativeReads=0.778	GT:AD:AF:DP:F1R2:F2R1:GQ:PL:GP:PRI:SB:MB:PS	1|1:0,7:1.000:7:0,5:0,2:18:84,21,0:4.3173e+01,1.8173e+01,6.6865e-02:0.00,38.00,41.00:0,0,7,0:0,0,5,2:126202
ENA|KF241981|KF241981.1	126261	.	A	AGCT	46.1	PASS	AC=2;AF=1.000;AN=2;DP=9;FS=0.000;MQ=25.00;QD=5.12;SOR=4.407;FractionInformativeReads=0.889	GT:AD:AF:DP:F1R2:F2R1:GQ:PL:GP:PRI:SB:MB:PS	1|1:0,8:1.000:8:0,6:0,2:21:85,24,0:4.6098e+01,2.1098e+01,3.3968e-02:0.00,36.00,39.00:0,0,8,0:0,0,6,2:126202
ENA|KF241981|KF241981.1	126263	.	C	CTT	49.11	PASS	AC=2;AF=1.000;AN=2;DP=9;FS=0.000;MQ=25.00;QD=5.46;SOR=4.615;FractionInformativeReads=1.000	GT:AD:AF:DP:F1R2:F2R1:GQ:PL:GP:PRI:SB:MB:PS	1|1:0,9:1.000:9:0,6:0,3:24:90,27,0:4.9108e+01,2.4108e+01,1.6953e-02:0.00,38.00,41.00:0,0,9,0:0,0,6,3:126202
ENA|KF241981|KF241981.1	126267	.	G	GTGCAAC	49.11	PASS	AC=2;AF=1.000;AN=2;DP=9;FS=0.000;MQ=25.00;QD=5.46;SOR=4.615;FractionInformativeReads=1.000	GT:AD:AF:DP:F1R2:F2R1:GQ:PL:GP:PRI:SB:MB:PS	1|1:0,9:1.000:9:0,6:0,3:24:90,27,0:4.9108e+01,2.4108e+01,1.6950e-02:0.00,38.00,41.00:0,0,9,0:0,0,6,3:126202
ENA|KF241981|KF241981.1	126270	.	AG	A	49.11	PASS	AC=2;AF=1.000;AN=2;DP=9;FS=0.000;MQ=25.00;QD=5.46;SOR=4.615;FractionInformativeReads=1.000	GT:AD:AF:DP:F1R2:F2R1:GQ:PL:GP:PRI:SB:MB:PS	1|1:0,9:1.000:9:0,6:0,3:24:90,27,0:4.9106e+01,2.4106e+01,1.6959e-02:0.00,38.00,41.00:0,0,9,0:0,0,6,3:126202
ENA|KF241981|KF241981.1	126276	.	T	C	49.11	PASS	AC=2;AF=1.000;AN=2;DP=9;FS=0.000;MQ=25.00;QD=5.46;SOR=4.615;FractionInformativeReads=1.000	GT:AD:AF:DP:F1R2:F2R1:GQ:PL:GP:PRI:SB:MB:PS	1|1:0,9:1.000:9:0,6:0,3:24:87,27,0:4.9108e+01,2.4108e+01,1.6950e-02:0.00,34.77,37.77:0,0,9,0:0,0,6,3:126202
ENA|KF241981|KF241981.1	126279	.	A	G	49.11	PASS	AC=2;AF=1.000;AN=2;DP=9;FS=0.000;MQ=25.00;QD=5.46;SOR=4.615;FractionInformativeReads=1.000	GT:AD:AF:DP:F1R2:F2R1:GQ:PL:GP:PRI:SB:MB:PS	1|1:0,9:1.000:9:0,6:0,3:24:87,27,0:4.9108e+01,2.4108e+01,1.6950e-02:0.00,34.77,37.77:0,0,9,0:0,0,6,3:126202
ENA|KF241981|KF241981.1	126314	.	G	T	46.11	PASS	AC=2;AF=1.000;AN=2;DP=10;FS=0.000;MQ=25.00;QD=4.61;SOR=4.407;FractionInformativeReads=0.800	GT:AD:AF:DP:F1R2:F2R1:GQ:PL:GP:PRI:SB:MB:PS	1|1:0,8:1.000:8:0,5:0,3:21:84,24,0:4.6114e+01,2.1114e+01,3.3840e-02:0.00,34.77,37.77:0,0,8,0:0,0,5,3:126314
ENA|KF241981|KF241981.1	126323	.	C	CGA	61.13	PASS	AC=2;AF=1.000;AN=2;DP=13;FS=0.000;MQ=24.34;QD=4.70;SOR=1.179;FractionInformativeReads=1.000	GT:AD:AF:DP:F1R2:F2R1:GQ:PL:GP:PRI:SB:MB:PS	1|1:0,13:1.000:13:0,7:0,6:36:102,39,0:6.1133e+01,3.6133e+01,1.0615e-03:0.00,38.00,41.00:0,0,5,8:0,0,7,6:126314
ENA|KF241981|KF241981.1	126324	.	CGT	C	64.14	PASS	AC=2;AF=1.000;AN=2;DP=14;FS=0.000;MQ=24.18;QD=4.58;SOR=1.765;FractionInformativeReads=1.000	GT:AD:AF:DP:F1R2:F2R1:GQ:PL:GP:PRI:SB:MB:PS	1|1:0,14:1.000:14:0,8:0,6:39:105,42,0:6.4143e+01,3.9143e+01,5.3069e-04:0.00,38.00,41.00:0,0,4,10:0,0,8,6:126314
ENA|KF241981|KF241981.1	126328	.	TG	T	64.14	PASS	AC=2;AF=1.000;AN=2;DP=14;FS=0.000;MQ=24.18;QD=4.58;SOR=1.765;FractionInformativeReads=1.000	GT:AD:AF:DP:F1R2:F2R1:GQ:PL:GP:PRI:SB:MB:PS	1|1:0,14:1.000:14:0,8:0,6:39:105,42,0:6.4139e+01,3.9139e+01,5.3121e-04:0.00,38.00,41.00:0,0,4,10:0,0,8,6:126314
ENA|KF241981|KF241981.1	126330	.	G	T	64.14	PASS	AC=2;AF=1.000;AN=2;DP=14;FS=0.000;MQ=24.18;QD=4.58;SOR=0.976;FractionInformativeReads=1.000	GT:AD:AF:DP:F1R2:F2R1:GQ:PL:GP:PRI:SB:MB:PS	1|1:0,14:1.000:14:0,8:0,6:39:102,42,0:6.4138e+01,3.9138e+01,5.3147e-04:0.00,34.77,37.77:0,0,6,8:0,0,8,6:126314
ENA|KF241981|KF241981.1	126334	.	A	ATT	64.14	PASS	AC=2;AF=1.000;AN=2;DP=14;FS=0.000;MQ=24.18;QD=4.58;SOR=2.303;FractionInformativeReads=1.000	GT:AD:AF:DP:F1R2:F2R1:GQ:PL:GP:PRI:SB:MB:PS	1|1:0,14:1.000:14:0,8:0,6:39:105,42,0:6.4143e+01,3.9143e+01,5.3069e-04:0.00,38.00,41.00:0,0,3,11:0,0,7,7:126314
ENA|KF241981|KF241981.1	126335	.	CCG	C	67.15	PASS	AC=2;AF=1.000;AN=2;DP=15;FS=0.000;MQ=23.87;QD=4.48;SOR=2.448;FractionInformativeReads=1.000	GT:AD:AF:DP:F1R2:F2R1:GQ:PL:GP:PRI:SB:MB:PS	1|1:0,15:1.000:15:0,8:0,7:42:108,45,0:6.7153e+01,4.2153e+01,2.6534e-04:0.00,38.00,41.00:0,0,3,12:0,0,8,7:126314
ENA|KF241981|KF241981.1	126356	.	T	G	67.14	PASS	AC=2;AF=1.000;AN=2;DP=15;FS=0.000;MQ=23.87;QD=4.48;SOR=3.126;FractionInformativeReads=1.000	GT:AD:AF:DP:F1R2:F2R1:GQ:PL:GP:PRI:SB:MB:PS	1|1:0,15:1.000:15:0,8:0,7:42:105,45,0:6.7140e+01,4.2140e+01,2.6612e-04:0.00,34.77,37.77:0,0,2,13:0,0,7,8:126356
ENA|KF241981|KF241981.1	126357	.	G	A	67.14	PASS	AC=2;AF=1.000;AN=2;DP=15;FS=0.000;MQ=23.87;QD=4.48;SOR=3.126;FractionInformativeReads=1.000	GT:AD:AF:DP:F1R2:F2R1:GQ:PL:GP:PRI:SB:MB:PS	1|1:0,15:1.000:15:0,8:0,7:42:105,45,0:6.7139e+01,4.2139e+01,2.6612e-04:0.00,34.77,37.77:0,0,2,13:0,0,7,8:126356
ENA|KF241981|KF241981.1	126363	.	T	C	67.14	PASS	AC=2;AF=1.000;AN=2;DP=15;FS=0.000;MQ=23.87;QD=4.48;SOR=4.047;FractionInformativeReads=1.000	GT:AD:AF:DP:F1R2:F2R1:GQ:PL:GP:PRI:SB:MB:PS	1|1:0,15:1.000:15:0,8:0,7:42:105,45,0:6.7142e+01,4.2142e+01,2.6612e-04:0.00,34.77,37.77:0,0,1,14:0,0,6,9:126356
ENA|KF241981|KF241981.1	126368	.	G	T	67.14	PASS	AC=2;AF=1.000;AN=2;DP=15;FS=0.000;MQ=23.87;QD=4.48;SOR=5.549;FractionInformativeReads=1.000	GT:AD:AF:DP:F1R2:F2R1:GQ:PL:GP:PRI:SB:MB:PS	1|1:0,15:1.000:15:0,8:0,7:42:105,45,0:6.7138e+01,4.2138e+01,2.6637e-04:0.00,34.77,37.77:0,0,0,15:0,0,7,8:126356
ENA|KF241981|KF241981.1	126379	.	C	A	66.69	PASS	AC=2;AF=1.000;AN=2;DP=15;FS=0.000;MQ=23.87;QD=4.45;SOR=5.549;FractionInformativeReads=1.000	GT:AD:AF:DP:F1R2:F2R1:GQ:PL:GP:PRI:SB:MB:PS	1|1:0,15:1.000:15:0,8:0,7:42:104,45,0:6.6695e+01,4.1695e+01,2.9485e-04:0.00,34.77,37.77:0,0,0,15:0,0,7,8:126379
ENA|KF241981|KF241981.1	126384	.	A	G	66.69	PASS	AC=2;AF=1.000;AN=2;DP=15;FS=0.000;MQ=23.87;QD=4.45;SOR=5.549;FractionInformativeReads=1.000	GT:AD:AF:DP:F1R2:F2R1:GQ:PL:GP:PRI:SB:MB:PS	1|1:0,15:1.000:15:0,8:0,7:42:104,45,0:6.6694e+01,4.1694e+01,2.9485e-04:0.00,34.77,37.77:0,0,0,15:0,0,7,8:126379
ENA|KF241981|KF241981.1	126390	.	A	G	67.15	PASS	AC=2;AF=1.000;AN=2;DP=15;FS=0.000;MQ=23.87;QD=4.48;SOR=5.549;FractionInformativeReads=1.000	GT:AD:AF:DP:F1R2:F2R1:GQ:PL:GP:PRI:SB:MB:PS	1|1:0,15:1.000:15:0,8:0,7:42:105,45,0:6.7151e+01,4.2151e+01,2.6560e-04:0.00,34.77,37.77:0,0,0,15:0,0,7,8:126379
ENA|KF241981|KF241981.1	126393	.	TGAGG	TAGG,T	82.31	PASS	AC=1,1;AF=0.500,0.500;AN=2;DP=15;FS=0.000;MQ=23.87;QD=5.49;SOR=5.549;FractionInformativeReads=1.000	GT:AD:AF:DP:F1R2:F2R1:GQ:PL:GP:PRI:SB:MB	1/2:0,12,3:0.800,0.200:15:0,6,2:0,6,1:15:158,95,50,377,0,63:8.2309e+01,5.7309e+01,1.5572e+01,3.3959e+02,1.2897e-01,2.8129e+01:0.00,38.00,41.00,38.00,76.00,41.00:0,0,0,15:0,0,7,8
ENA|KF241981|KF241981.1	126396	.	G	C	25.14	PASS	AC=1;AF=0.500;AN=2;DP=15;FS=0.000;MQ=23.87;MQRankSum=1.227;QD=1.68;ReadPosRankSum=2.093;SOR=2.448;FractionInformativeReads=1.000;R2_5P_bias=-25.225	GT:AD:AF:DP:F1R2:F2R1:GQ:PL:GP:PRI:SB:MB:PS	0|1:3,12:0.800:15:2,6:1,6:15:60,0,12:2.5136e+01,1.3562e-01,1.5578e+01:0.00,34.77,37.77:0,3,0,12:1,2,6,6:126396
ENA|KF241981|KF241981.1	126398	.	A	AT	25.14	PASS	AC=1;AF=0.500;AN=2;DP=15;FS=0.000;MQ=23.87;MQRankSum=1.227;QD=1.68;ReadPosRankSum=2.093;SOR=2.448;FractionInformativeReads=1.000;R2_5P_bias=-25.225	GT:AD:AF:DP:F1R2:F2R1:GQ:PL:GP:PRI:SB:MB:PS	0|1:3,12:0.800:15:2,6:1,6:15:63,0,12:2.5136e+01,1.3561e-01,1.5579e+01:0.00,38.00,41.00:0,3,0,12:1,2,6,6:126396
ENA|KF241981|KF241981.1	126400	.	G	GATC	12.69	PASS	AC=1;AF=0.500;AN=2;DP=15;FS=0.000;MQ=23.87;MQRankSum=1.371;QD=0.85;ReadPosRankSum=2.526;SOR=0.090;FractionInformativeReads=1.000;R2_5P_bias=4.103	GT:AD:AF:DP:F1R2:F2R1:GQ:PL:GP:PRI:SB:MB:PS	0|1:12,3:0.200:15:6,2:6,1:13:48,0,25:1.2690e+01,2.4719e-01,2.8247e+01:0.00,36.00,39.00:0,12,0,3:6,6,1,2:126400
ENA|KF241981|KF241981.1	126401	.	GGT	G	25.14	PASS	AC=1;AF=0.500;AN=2;DP=15;FS=0.000;MQ=23.87;MQRankSum=1.227;QD=1.68;ReadPosRankSum=2.526;SOR=2.448;FractionInformativeReads=1.000;R2_5P_bias=-25.225	GT:AD:AF:DP:F1R2:F2R1:GQ:PL:GP:PRI:SB:MB:PS	0|1:3,12:0.800:15:2,6:1,6:15:61,0,12:2.5136e+01,1.3553e-01,1.5581e+01:0.00,36.00,39.00:0,3,0,12:1,2,6,6:126396
ENA|KF241981|KF241981.1	126406	.	T	TA	12.69	PASS	AC=1;AF=0.500;AN=2;DP=15;FS=0.000;MQ=23.87;MQRankSum=1.371;QD=0.85;ReadPosRankSum=2.526;SOR=0.090;FractionInformativeReads=1.000;R2_5P_bias=4.103	GT:AD:AF:DP:F1R2:F2R1:GQ:PL:GP:PRI:SB:MB:PS	0|1:12,3:0.200:15:6,2:6,1:13:43,0,25:1.2691e+01,2.4712e-01,2.8247e+01:0.00,31.00,34.00:0,12,0,3:6,6,1,2:126400
ENA|KF241981|KF241981.1	126408	.	G	GT	25.14	PASS	AC=1;AF=0.500;AN=2;DP=15;FS=0.000;MQ=23.87;MQRankSum=1.227;QD=1.68;ReadPosRankSum=2.526;SOR=2.448;FractionInformativeReads=1.000;R2_5P_bias=-25.225	GT:AD:AF:DP:F1R2:F2R1:GQ:PL:GP:PRI:SB:MB:PS	0|1:3,12:0.800:15:2,6:1,6:15:63,0,12:2.5136e+01,1.3560e-01,1.5579e+01:0.00,38.00,41.00:0,3,0,12:1,2,6,6:126396
ENA|KF241981|KF241981.1	126410	.	A	G	17.69	PASS	AC=1;AF=0.500;AN=2;DP=15;FS=0.000;MQ=23.87;MQRankSum=1.893;QD=1.18;ReadPosRankSum=2.807;SOR=0.160;FractionInformativeReads=1.000;R2_5P_bias=4.860	GT:AD:AF:DP:F1R2:F2R1:GQ:PL:GP:PRI:SB:MB:PS	0|1:11,4:0.267:15:5,3:6,1:17:52,0,25:1.7691e+01,8.1415e-02,2.8081e+01:0.00,34.77,37.77:0,11,0,4:6,5,1,3:126400
ENA|KF241981|KF241981.1	126411	.	G	GA,A	91.69	PASS	AC=1,1;AF=0.500,0.500;AN=2;DP=15;FS=0.000;MQ=23.87;QD=6.11;SOR=5.549;FractionInformativeReads=1.000	GT:AD:AF:DP:F1R2:F2R1:GQ:PL:GP:PRI:SB:MB	1/2:0,12,3:0.800,0.200:15:0,6,2:0,6,1:15:164,101,47,427,0,63:9.1694e+01,6.6694e+01,1.5566e+01,3.8890e+02,1.2915e-01,2.8129e+01:0.00,38.00,41.00,34.77,72.77,37.77:0,0,0,15:0,0,7,8
ENA|KF241981|KF241981.1	126419	.	A	C	67.15	PASS	AC=2;AF=1.000;AN=2;DP=15;FS=0.000;MQ=23.87;QD=4.48;SOR=5.549;FractionInformativeReads=1.000	GT:AD:AF:DP:F1R2:F2R1:GQ:PL:GP:PRI:SB:MB:PS	1|1:0,15:1.000:15:0,8:0,7:42:105,45,0:6.7152e+01,4.2152e+01,2.6534e-04:0.00,34.77,37.77:0,0,0,15:0,0,7,8:126379
ENA|KF241981|KF241981.1	126420	.	C	A	67.15	PASS	AC=2;AF=1.000;AN=2;DP=15;FS=0.000;MQ=23.87;QD=4.48;SOR=5.549;FractionInformativeReads=1.000	GT:AD:AF:DP:F1R2:F2R1:GQ:PL:GP:PRI:SB:MB:PS	1|1:0,15:1.000:15:0,8:0,7:42:105,45,0:6.7148e+01,4.2148e+01,2.6560e-04:0.00,34.77,37.77:0,0,0,15:0,0,7,8:126379
ENA|KF241981|KF241981.1	126428	.	A	G	67.15	PASS	AC=2;AF=1.000;AN=2;DP=15;FS=0.000;MQ=23.87;QD=4.48;SOR=5.549;FractionInformativeReads=1.000	GT:AD:AF:DP:F1R2:F2R1:GQ:PL:GP:PRI:SB:MB:PS	1|1:0,15:1.000:15:0,8:0,7:42:105,45,0:6.7152e+01,4.2152e+01,2.6534e-04:0.00,34.77,37.77:0,0,0,15:0,0,7,8:126379
ENA|KF241981|KF241981.1	126429	.	G	C	67.15	PASS	AC=2;AF=1.000;AN=2;DP=15;FS=0.000;MQ=23.87;QD=4.48;SOR=5.549;FractionInformativeReads=1.000	GT:AD:AF:DP:F1R2:F2R1:GQ:PL:GP:PRI:SB:MB:PS	1|1:0,15:1.000:15:0,8:0,7:42:105,45,0:6.7153e+01,4.2153e+01,2.6534e-04:0.00,34.77,37.77:0,0,0,15:0,0,7,8:126379
ENA|KF241981|KF241981.1	126430	.	A	T	67.15	PASS	AC=2;AF=1.000;AN=2;DP=15;FS=0.000;MQ=23.87;QD=4.48;SOR=5.549;FractionInformativeReads=1.000	GT:AD:AF:DP:F1R2:F2R1:GQ:PL:GP:PRI:SB:MB:PS	1|1:0,15:1.000:15:0,8:0,7:42:105,45,0:6.7152e+01,4.2152e+01,2.6534e-04:0.00,34.77,37.77:0,0,0,15:0,0,7,8:126379
ENA|KF241981|KF241981.1	126432	.	C	G	67.15	PASS	AC=2;AF=1.000;AN=2;DP=15;FS=0.000;MQ=23.87;QD=4.48;SOR=5.549;FractionInformativeReads=1.000	GT:AD:AF:DP:F1R2:F2R1:GQ:PL:GP:PRI:SB:MB:PS	1|1:0,15:1.000:15:0,8:0,7:42:105,45,0:6.7152e+01,4.2152e+01,2.6534e-04:0.00,34.77,37.77:0,0,0,15:0,0,7,8:126379
ENA|KF241981|KF241981.1	126435	.	G	A	67.15	PASS	AC=2;AF=1.000;AN=2;DP=15;FS=0.000;MQ=23.87;QD=4.48;SOR=5.549;FractionInformativeReads=1.000	GT:AD:AF:DP:F1R2:F2R1:GQ:PL:GP:PRI:SB:MB:PS	1|1:0,15:1.000:15:0,8:0,7:42:105,45,0:6.7152e+01,4.2152e+01,2.6534e-04:0.00,34.77,37.77:0,0,0,15:0,0,7,8:126379
ENA|KF241981|KF241981.1	126639	.	C	G	10.63	LowDepth	AC=2;AF=1.000;AN=2;DP=1;FS=0.000;MQ=23.00;QD=10.63;SOR=1.609;FractionInformativeReads=1.000	GT:AD:AF:DP:F1R2:F2R1:GQ:PL:GP:PRI:SB:MB	1/1:0,1:1.000:1:0,0:0,1:3:45,3,0:1.0628e+01,3.4084e+00,3.3983e+00:0.00,34.77,37.77:0,0,0,1:0,0,1,0

## Sheet: L1_light #1
VCF Metadata of sample #5 - L1_light #1
##fileformat=VCFv4.2
##FORMAT=<ID=AD,Number=R,Type=Integer,Description="Allelic depths (counting only informative reads out of the total reads) for the ref and alt alleles in the order listed">
##FORMAT=<ID=AF,Number=A,Type=Float,Description="Allele fractions for alt alleles in the order listed">
##FORMAT=<ID=DP,Number=1,Type=Integer,Description="Approximate read depth (reads with MQ=255 or with bad mates are filtered)">
##FORMAT=<ID=F1R2,Number=R,Type=Integer,Description="Count of reads in F1R2 pair orientation supporting each allele">
##FORMAT=<ID=F2R1,Number=R,Type=Integer,Description="Count of reads in F2R1 pair orientation supporting each allele">
##FORMAT=<ID=GP,Number=G,Type=Float,Description="Phred-scaled posterior probabilities for genotypes as defined in the VCF specification">
##FORMAT=<ID=GQ,Number=1,Type=Integer,Description="Genotype Quality">
##FORMAT=<ID=GT,Number=1,Type=String,Description="Genotype">
##FORMAT=<ID=MB,Number=4,Type=Integer,Description="Per-sample component statistics to detect mate bias">
##FORMAT=<ID=PL,Number=G,Type=Integer,Description="Normalized, Phred-scaled likelihoods for genotypes as defined in the VCF specification">
##FORMAT=<ID=PRI,Number=G,Type=Float,Description="Phred-scaled prior probabilities for genotypes">
##FORMAT=<ID=PS,Number=1,Type=Integer,Description="Physical phasing ID information, where each unique ID within a given sample (but not across samples) connects records within a phasing group">
##FORMAT=<ID=SB,Number=4,Type=Integer,Description="Per-sample component statistics which comprise the Fisher's Exact Test to detect strand bias">
##DRAGENCommandLine=<ID=HashTableBuild,Version="SW: 01.003.044.3.8.4, HashTableVersion: 8",CommandLineOptions="/opt/edico/bin/dragen --lic-instance-id-location /root/.edico --build-hash-table true --ht-reference /data/input/appresults/156901751/Ref_Zm Cp_KF241981.fasta --ht-alt-aware-validate true --output-directory /data/scratch/Ref_Zm_Cp_KF241981">
##DRAGENCommandLine=<ID=dragen,Version="SW: 05.021.602.3.8.4, HW: 05.021.602",Date="Wed Jun 23 06:18:20 UTC 2021",CommandLineOptions="--lic-server https://XXXXXXXXXXXX:YYYYYYYYYYYYYYYYYYYYYYYYYYYYYYYY@license.edicogenome.com --lic-instance-id-location /root/.edico --output_status_file /data/scratch/progress.log --enable-duplicate-marking true --enable-map-align true --enable-map-align-output true…
##INFO=<ID=AC,Number=A,Type=Integer,Description="Allele count in genotypes, for each ALT allele, in the same order as listed">
##INFO=<ID=AF,Number=A,Type=Float,Description="Allele Frequency, for each ALT allele, in the same order as listed">
##INFO=<ID=AN,Number=1,Type=Integer,Description="Total number of alleles in called genotypes">
##INFO=<ID=DB,Number=0,Type=Flag,Description="dbSNP Membership">
##INFO=<ID=DP,Number=1,Type=Integer,Description="Approximate read depth (informative and non-informative); some reads may have been filtered based on mapq etc.">
##INFO=<ID=END,Number=1,Type=Integer,Description="Stop position of the interval">
##INFO=<ID=FS,Number=1,Type=Float,Description="Phred-scaled p-value using Fisher's exact test to detect strand bias">
##INFO=<ID=FractionInformativeReads,Number=1,Type=Float,Description="The fraction of informative reads out of the total reads">
##INFO=<ID=MQ,Number=1,Type=Float,Description="RMS Mapping Quality">
##INFO=<ID=MQRankSum,Number=1,Type=Float,Description="Z-score From Wilcoxon rank sum test of Alt vs. Ref read mapping qualities">
##INFO=<ID=QD,Number=1,Type=Float,Description="Variant Confidence/Quality by Depth">
##INFO=<ID=R2_5P_bias,Number=1,Type=Float,Description="Score based on mate bias and distance from 5 prime end">
##INFO=<ID=ReadPosRankSum,Number=1,Type=Float,Description="Z-score from Wilcoxon rank sum test of Alt vs. Ref read position bias">
##INFO=<ID=SOR,Number=1,Type=Float,Description="Symmetric Odds Ratio of 2x2 contingency table to detect strand bias">
##FILTER=<ID=DRAGENSnpHardQUAL,Description="Set if true:QUAL < 10.41">
##FILTER=<ID=DRAGENIndelHardQUAL,Description="Set if true:QUAL < 7.83">
##FILTER=<ID=LowDepth,Description="Set if true:DP <= 1">
##FILTER=<ID=LowGQ,Description="Set if true:GQ = 0">
##FILTER=<ID=PloidyConflict,Description="Genotype call from variant caller not consistent with chromosome ploidy">
##FILTER=<ID=RMxNRepeatRegion,Description="Site filtered because all or part of the variant allele is a repeat of the reference">
##contig=<ID=ENA|KF241981|KF241981.1,length=140447>
##reference=file:///data/scratch/Ref_Zm_Cp_KF241981.v8/254780843/reference.bin
#CHROM	POS	ID	REF	ALT	QUAL	FILTER	INFO	FORMAT	302336
ENA|KF241981|KF241981.1	3242	.	GC	G	434.98	PASS	AC=2;AF=1.000;AN=2;DP=148;FS=0.000;MQ=240.75;QD=2.94;SOR=1.241;FractionInformativeReads=0.872	GT:AD:AF:DP:F1R2:F2R1:GQ:PL:GP:PRI:SB:MB	1/1:0,129:1.000:129:0,61:0,68:385:476,388,0:4.3492e+02,3.8498e+02,0.0000e+00:0.00,38.00,41.00:0,0,50,79:0,0,66,63
ENA|KF241981|KF241981.1	3754	.	T	TAA	362.88	PASS	AC=2;AF=1.000;AN=2;DP=132;FS=0.000;MQ=245.26;QD=2.75;SOR=1.136;FractionInformativeReads=0.803	GT:AD:AF:DP:F1R2:F2R1:GQ:PL:GP:PRI:SB:MB	1/1:0,106:1.000:106:0,55:0,51:313:373,316,0:3.6288e+02,3.1288e+02,0.0000e+00:0.00,7.00,10.00:0,0,43,63:0,0,52,54
ENA|KF241981|KF241981.1	12961	.	A	ATTTTTTT,ATTTTTT	437.47	PASS	AC=1,1;AF=0.500,0.500;AN=2;DP=133;FS=0.000;MQ=236.21;MQRankSum=1.202;QD=3.29;ReadPosRankSum=1.060;SOR=0.465;FractionInformativeReads=0.737;R2_5P_bias=0.000	GT:AD:AF:DP:F1R2:F2R1:GQ:PL:GP:PRI:SB:MB	1/2:1,35,62:0.357,0.633:98:1,17,27:0,18,35:46:451,464,54,394,0,52:4.3740e+02,4.5000e+02,5.0000e+01,3.8747e+02,1.1675e-04,4.7723e+01:0.00,7.00,10.01,7.00,14.00,10.01:0,1,38,59:0,1,53,44
ENA|KF241981|KF241981.1	17176	.	AG	A	13.39	PASS	AC=1;AF=0.500;AN=2;DP=133;FS=0.000;MQ=239.26;MQRankSum=5.296;QD=0.10;ReadPosRankSum=0.931;SOR=0.632;FractionInformativeReads=0.782;R2_5P_bias=46.535	GT:AD:AF:DP:F1R2:F2R1:GQ:PL:GP:PRI:SB:MB	0/1:83,21:0.202:104:50,8:33,13:13:19,0,50:1.3387e+01,2.0385e-01,5.3204e+01:0.00,6.00,9.00:31,52,8,13:42,41,9,12

## Sheet: L1_light #2
VCF Metadata of sample #6 - L1_light #2
##fileformat=VCFv4.2
##FORMAT=<ID=AD,Number=R,Type=Integer,Description="Allelic depths (counting only informative reads out of the total reads) for the ref and alt alleles in the order listed">
##FORMAT=<ID=AF,Number=A,Type=Float,Description="Allele fractions for alt alleles in the order listed">
##FORMAT=<ID=DP,Number=1,Type=Integer,Description="Approximate read depth (reads with MQ=255 or with bad mates are filtered)">
##FORMAT=<ID=F1R2,Number=R,Type=Integer,Description="Count of reads in F1R2 pair orientation supporting each allele">
##FORMAT=<ID=F2R1,Number=R,Type=Integer,Description="Count of reads in F2R1 pair orientation supporting each allele">
##FORMAT=<ID=GP,Number=G,Type=Float,Description="Phred-scaled posterior probabilities for genotypes as defined in the VCF specification">
##FORMAT=<ID=GQ,Number=1,Type=Integer,Description="Genotype Quality">
##FORMAT=<ID=GT,Number=1,Type=String,Description="Genotype">
##FORMAT=<ID=MB,Number=4,Type=Integer,Description="Per-sample component statistics to detect mate bias">
##FORMAT=<ID=PL,Number=G,Type=Integer,Description="Normalized, Phred-scaled likelihoods for genotypes as defined in the VCF specification">
##FORMAT=<ID=PRI,Number=G,Type=Float,Description="Phred-scaled prior probabilities for genotypes">
##FORMAT=<ID=PS,Number=1,Type=Integer,Description="Physical phasing ID information, where each unique ID within a given sample (but not across samples) connects records within a phasing group">
##FORMAT=<ID=SB,Number=4,Type=Integer,Description="Per-sample component statistics which comprise the Fisher's Exact Test to detect strand bias">
##DRAGENCommandLine=<ID=HashTableBuild,Version="SW: 01.003.044.3.8.4, HashTableVersion: 8",CommandLineOptions="/opt/edico/bin/dragen --lic-instance-id-location /root/.edico --build-hash-table true --ht-reference /data/input/appresults/156901751/Ref_Zm Cp_KF241981.fasta --ht-alt-aware-validate true --output-directory /data/scratch/Ref_Zm_Cp_KF241981">
##DRAGENCommandLine=<ID=dragen,Version="SW: 05.021.602.3.8.4, HW: 05.021.602",Date="Wed Jun 23 14:52:09 UTC 2021",CommandLineOptions="--lic-server https://XXXXXXXXXXXX:YYYYYYYYYYYYYYYYYYYYYYYYYYYYYYYY@license.edicogenome.com --lic-instance-id-location /root/.edico --output_status_file /data/scratch/progress.log --enable-duplicate-marking true --enable-map-align true --enable-map-align-output true…
##INFO=<ID=AC,Number=A,Type=Integer,Description="Allele count in genotypes, for each ALT allele, in the same order as listed">
##INFO=<ID=AF,Number=A,Type=Float,Description="Allele Frequency, for each ALT allele, in the same order as listed">
##INFO=<ID=AN,Number=1,Type=Integer,Description="Total number of alleles in called genotypes">
##INFO=<ID=DB,Number=0,Type=Flag,Description="dbSNP Membership">
##INFO=<ID=DP,Number=1,Type=Integer,Description="Approximate read depth (informative and non-informative); some reads may have been filtered based on mapq etc.">
##INFO=<ID=END,Number=1,Type=Integer,Description="Stop position of the interval">
##INFO=<ID=FS,Number=1,Type=Float,Description="Phred-scaled p-value using Fisher's exact test to detect strand bias">
##INFO=<ID=FractionInformativeReads,Number=1,Type=Float,Description="The fraction of informative reads out of the total reads">
##INFO=<ID=MQ,Number=1,Type=Float,Description="RMS Mapping Quality">
##INFO=<ID=MQRankSum,Number=1,Type=Float,Description="Z-score From Wilcoxon rank sum test of Alt vs. Ref read mapping qualities">
##INFO=<ID=QD,Number=1,Type=Float,Description="Variant Confidence/Quality by Depth">
##INFO=<ID=R2_5P_bias,Number=1,Type=Float,Description="Score based on mate bias and distance from 5 prime end">
##INFO=<ID=ReadPosRankSum,Number=1,Type=Float,Description="Z-score from Wilcoxon rank sum test of Alt vs. Ref read position bias">
##INFO=<ID=SOR,Number=1,Type=Float,Description="Symmetric Odds Ratio of 2x2 contingency table to detect strand bias">
##FILTER=<ID=DRAGENSnpHardQUAL,Description="Set if true:QUAL < 10.41">
##FILTER=<ID=DRAGENIndelHardQUAL,Description="Set if true:QUAL < 7.83">
##FILTER=<ID=LowDepth,Description="Set if true:DP <= 1">
##FILTER=<ID=LowGQ,Description="Set if true:GQ = 0">
##FILTER=<ID=PloidyConflict,Description="Genotype call from variant caller not consistent with chromosome ploidy">
##FILTER=<ID=RMxNRepeatRegion,Description="Site filtered because all or part of the variant allele is a repeat of the reference">
##contig=<ID=ENA|KF241981|KF241981.1,length=140447>
##reference=file:///data/scratch/Ref_Zm_Cp_KF241981.v8/254780843/reference.bin
#CHROM	POS	ID	REF	ALT	QUAL	FILTER	INFO	FORMAT	302337
ENA|KF241981|KF241981.1	3242	.	GC	G	432.33	PASS	AC=2;AF=1.000;AN=2;DP=151;FS=0.000;MQ=238.27;QD=2.86;SOR=1.224;FractionInformativeReads=0.848	GT:AD:AF:DP:F1R2:F2R1:GQ:PL:GP:PRI:SB:MB	1/1:0,128:1.000:128:0,67:0,61:382:473,385,0:4.3230e+02,3.8233e+02,0.0000e+00:0.00,38.00,41.00:0,0,50,78:0,0,67,61
ENA|KF241981|KF241981.1	3754	.	T	TAA	370.96	PASS	AC=2;AF=1.000;AN=2;DP=142;FS=0.000;MQ=244.00;MQRankSum=1.553;QD=2.61;ReadPosRankSum=0.986;SOR=0.441;FractionInformativeReads=0.817;R2_5P_bias=0.000	GT:AD:AF:DP:F1R2:F2R1:GQ:PL:GP:PRI:SB:MB	1/1:1,115:0.991:116:0,69:1,46:321:381,324,0:3.7096e+02,3.2096e+02,0.0000e+00:0.00,7.00,10.00:0,1,46,69:1,0,54,61
ENA|KF241981|KF241981.1	12961	.	A	ATTTTTT,ATTTTTTT	370.96	PASS	AC=1,1;AF=0.500,0.500;AN=2;DP=139;FS=0.000;MQ=238.09;MQRankSum=1.329;QD=2.67;ReadPosRankSum=-0.925;SOR=0.408;FractionInformativeReads=0.741;R2_5P_bias=0.000	GT:AD:AF:DP:F1R2:F2R1:GQ:PL:GP:PRI:SB:MB	1/2:1,76,26:0.738,0.252:103:1,33,9:0,43,17:11:383,327,14,565,0,56:3.7096e+02,3.2096e+02,1.0909e+01,4.5000e+02,3.6743e-01,5.3367e+01:0.00,6.00,9.00,6.00,12.00,9.00:0,1,42,60:0,1,60,42
ENA|KF241981|KF241981.1	129704	.	ACC	A	11.34	LowDepth	AC=2;AF=1.000;AN=2;DP=1;FS=0.000;MQ=20.00;QD=11.34;SOR=1.609;FractionInformativeReads=1.000	GT:AD:AF:DP:F1R2:F2R1:GQ:PL:GP:PRI:SB:MB	1/1:0,1:1.000:1:0,0:0,1:3:45,3,0:1.1337e+01,3.3470e+00,3.3368e+00:0.00,34.00,37.00:0,0,0,1:0,0,1,0
ENA|KF241981|KF241981.1	129716	.	C	CCA	7.3	DRAGENIndelHardQUAL;LowDepth	AC=2;AF=1.000;AN=2;DP=1;FS=0.000;MQ=20.00;QD=7.30;SOR=1.609;FractionInformativeReads=1.000	GT:AD:AF:DP:F1R2:F2R1:GQ:PL:GP:PRI:SB:MB	1/1:0,1:1.000:1:0,0:0,1:2:42,3,0:7.2956e+00,3.9112e+00,3.9011e+00:0.00,36.00,39.00:0,0,0,1:0,0,1,0

## Sheet: Stalk_light #1
VCF Metadata of sample #7 - Stalk_light #1
##fileformat=VCFv4.2
##FORMAT=<ID=AD,Number=R,Type=Integer,Description="Allelic depths (counting only informative reads out of the total reads) for the ref and alt alleles in the order listed">
##FORMAT=<ID=AF,Number=A,Type=Float,Description="Allele fractions for alt alleles in the order listed">
##FORMAT=<ID=DP,Number=1,Type=Integer,Description="Approximate read depth (reads with MQ=255 or with bad mates are filtered)">
##FORMAT=<ID=F1R2,Number=R,Type=Integer,Description="Count of reads in F1R2 pair orientation supporting each allele">
##FORMAT=<ID=F2R1,Number=R,Type=Integer,Description="Count of reads in F2R1 pair orientation supporting each allele">
##FORMAT=<ID=GP,Number=G,Type=Float,Description="Phred-scaled posterior probabilities for genotypes as defined in the VCF specification">
##FORMAT=<ID=GQ,Number=1,Type=Integer,Description="Genotype Quality">
##FORMAT=<ID=GT,Number=1,Type=String,Description="Genotype">
##FORMAT=<ID=MB,Number=4,Type=Integer,Description="Per-sample component statistics to detect mate bias">
##FORMAT=<ID=PL,Number=G,Type=Integer,Description="Normalized, Phred-scaled likelihoods for genotypes as defined in the VCF specification">
##FORMAT=<ID=PRI,Number=G,Type=Float,Description="Phred-scaled prior probabilities for genotypes">
##FORMAT=<ID=PS,Number=1,Type=Integer,Description="Physical phasing ID information, where each unique ID within a given sample (but not across samples) connects records within a phasing group">
##FORMAT=<ID=SB,Number=4,Type=Integer,Description="Per-sample component statistics which comprise the Fisher's Exact Test to detect strand bias">
##DRAGENCommandLine=<ID=HashTableBuild,Version="SW: 01.003.044.3.8.4, HashTableVersion: 8",CommandLineOptions="/opt/edico/bin/dragen --lic-instance-id-location /root/.edico --build-hash-table true --ht-reference /data/input/appresults/156901751/Ref_Zm Cp_KF241981.fasta --ht-alt-aware-validate true --output-directory /data/scratch/Ref_Zm_Cp_KF241981">
##DRAGENCommandLine=<ID=dragen,Version="SW: 05.021.602.3.8.4, HW: 05.021.602",Date="Wed Jun 23 15:23:40 UTC 2021",CommandLineOptions="--lic-server https://XXXXXXXXXXXX:YYYYYYYYYYYYYYYYYYYYYYYYYYYYYYYY@license.edicogenome.com --lic-instance-id-location /root/.edico --output_status_file /data/scratch/progress.log --enable-duplicate-marking true --enable-map-align true --enable-map-align-output true…
##INFO=<ID=AC,Number=A,Type=Integer,Description="Allele count in genotypes, for each ALT allele, in the same order as listed">
##INFO=<ID=AF,Number=A,Type=Float,Description="Allele Frequency, for each ALT allele, in the same order as listed">
##INFO=<ID=AN,Number=1,Type=Integer,Description="Total number of alleles in called genotypes">
##INFO=<ID=DB,Number=0,Type=Flag,Description="dbSNP Membership">
##INFO=<ID=DP,Number=1,Type=Integer,Description="Approximate read depth (informative and non-informative); some reads may have been filtered based on mapq etc.">
##INFO=<ID=END,Number=1,Type=Integer,Description="Stop position of the interval">
##INFO=<ID=FS,Number=1,Type=Float,Description="Phred-scaled p-value using Fisher's exact test to detect strand bias">
##INFO=<ID=FractionInformativeReads,Number=1,Type=Float,Description="The fraction of informative reads out of the total reads">
##INFO=<ID=MQ,Number=1,Type=Float,Description="RMS Mapping Quality">
##INFO=<ID=MQRankSum,Number=1,Type=Float,Description="Z-score From Wilcoxon rank sum test of Alt vs. Ref read mapping qualities">
##INFO=<ID=QD,Number=1,Type=Float,Description="Variant Confidence/Quality by Depth">
##INFO=<ID=R2_5P_bias,Number=1,Type=Float,Description="Score based on mate bias and distance from 5 prime end">
##INFO=<ID=ReadPosRankSum,Number=1,Type=Float,Description="Z-score from Wilcoxon rank sum test of Alt vs. Ref read position bias">
##INFO=<ID=SOR,Number=1,Type=Float,Description="Symmetric Odds Ratio of 2x2 contingency table to detect strand bias">
##FILTER=<ID=DRAGENSnpHardQUAL,Description="Set if true:QUAL < 10.41">
##FILTER=<ID=DRAGENIndelHardQUAL,Description="Set if true:QUAL < 7.83">
##FILTER=<ID=LowDepth,Description="Set if true:DP <= 1">
##FILTER=<ID=LowGQ,Description="Set if true:GQ = 0">
##FILTER=<ID=PloidyConflict,Description="Genotype call from variant caller not consistent with chromosome ploidy">
##FILTER=<ID=RMxNRepeatRegion,Description="Site filtered because all or part of the variant allele is a repeat of the reference">
##contig=<ID=ENA|KF241981|KF241981.1,length=140447>
##reference=file:///data/scratch/Ref_Zm_Cp_KF241981.v8/254780843/reference.bin
#CHROM	POS	ID	REF	ALT	QUAL	FILTER	INFO	FORMAT	302338
ENA|KF241981|KF241981.1	3242	.	GC	G	436.99	PASS	AC=2;AF=1.000;AN=2;DP=146;FS=0.000;MQ=242.18;MQRankSum=1.325;QD=2.99;ReadPosRankSum=1.656;SOR=0.591;FractionInformativeReads=0.932;R2_5P_bias=0.000	GT:AD:AF:DP:F1R2:F2R1:GQ:PL:GP:PRI:SB:MB	1/1:1,135:0.993:136:1,59:0,76:387:478,390,0:4.3707e+02,3.8699e+02,0.0000e+00:0.00,38.00,41.00:0,1,48,87:0,1,68,67
ENA|KF241981|KF241981.1	3754	.	T	TAA	382.87	PASS	AC=2;AF=1.000;AN=2;DP=136;FS=0.000;MQ=245.49;QD=2.82;SOR=1.230;FractionInformativeReads=0.831	GT:AD:AF:DP:F1R2:F2R1:GQ:PL:GP:PRI:SB:MB	1/1:0,113:1.000:113:0,58:0,55:333:393,336,0:3.8287e+02,3.3287e+02,0.0000e+00:0.00,7.00,10.00:0,0,44,69:0,0,57,56
ENA|KF241981|KF241981.1	12961	.	A	ATTTTTT,ATTTTTTT	483.59	PASS	AC=1,1;AF=0.500,0.500;AN=2;DP=133;FS=0.000;MQ=242.13;QD=3.64;SOR=2.049;FractionInformativeReads=0.797	GT:AD:AF:DP:F1R2:F2R1:GQ:PL:GP:PRI:SB:MB	1/2:0,68,38:0.642,0.358:106:0,35,17:0,33,21:49:496,440,54,535,0,56:4.5000e+02,4.3362e+02,5.0968e+01,4.5000e+02,5.6432e-05,5.3000e+01:0.00,6.00,9.00,6.00,12.00,9.00:0,0,29,77:0,0,55,51
ENA|KF241981|KF241981.1	93260	.	CACTCCGTCCCGAAG	C	7.79	DRAGENIndelHardQUAL;LowDepth	AC=2;AF=1.000;AN=2;DP=1;FS=0.000;MQ=36.00;QD=7.79;SOR=1.609;FractionInformativeReads=1.000	GT:AD:AF:DP:F1R2:F2R1:GQ:PL:GP:PRI:SB:MB	1/1:0,1:1.000:1:0,0:0,1:2:45,3,0:7.7945e+00,3.8046e+00,3.7945e+00:0.00,38.00,41.00:0,0,0,1:0,0,1,0
ENA|KF241981|KF241981.1	93295	.	T	A	10.27	DRAGENSnpHardQUAL;LowDepth	AC=2;AF=1.000;AN=2;DP=1;FS=0.000;MQ=36.00;QD=10.27;SOR=1.609;FractionInformativeReads=1.000	GT:AD:AF:DP:F1R2:F2R1:GQ:PL:GP:PRI:SB:MB	1/1:0,1:1.000:1:0,0:0,1:3:45,3,0:1.0267e+01,3.4443e+00,3.4342e+00:0.00,34.77,37.77:0,0,0,1:0,0,1,0
ENA|KF241981|KF241981.1	118878	.	C	A	7.8	DRAGENSnpHardQUAL;LowDepth	AC=2;AF=1.000;AN=2;DP=1;FS=0.000;MQ=5.00;QD=7.80;SOR=1.609;FractionInformativeReads=1.000	GT:AD:AF:DP:F1R2:F2R1:GQ:PL:GP:PRI:SB:MB	1/1:0,1:1.000:1:0,1:0,0:2:42,3,0:7.7970e+00,3.8040e+00,3.7940e+00:0.00,34.77,37.77:0,0,0,1:0,0,0,1
ENA|KF241981|KF241981.1	120517	.	C	CTG	8.4	PASS	AC=1;AF=0.500;AN=2;DP=2;FS=0.000;MQ=15.81;MQRankSum=0.804;QD=4.20;ReadPosRankSum=0.804;SOR=0.693;FractionInformativeReads=1.000;R2_5P_bias=-8.044	GT:AD:AF:DP:F1R2:F2R1:GQ:PL:GP:PRI:SB:MB	0/1:1,1:0.500:2:0,0:1,1:5:36,0,4:8.4026e+00,1.4677e+00,8.4677e+00:0.00,29.00,32.00:1,0,1,0:0,1,0,1
ENA|KF241981|KF241981.1	123877	.	A	G	6.36	DRAGENSnpHardQUAL;LowDepth	AC=2;AF=1.000;AN=2;DP=1;FS=0.000;MQ=13.00;QD=6.36;SOR=1.609;FractionInformativeReads=1.000	GT:AD:AF:DP:F1R2:F2R1:GQ:PL:GP:PRI:SB:MB	1/1:0,1:1.000:1:0,1:0,0:2:40,3,0:6.3607e+00,4.1569e+00,4.1471e+00:0.00,34.77,37.77:0,0,1,0:0,0,1,0

## Sheet: Stalk_light #2
VCF Metadata of sample #8 - Stalk_light #2
##fileformat=VCFv4.2
##FORMAT=<ID=AD,Number=R,Type=Integer,Description="Allelic depths (counting only informative reads out of the total reads) for the ref and alt alleles in the order listed">
##FORMAT=<ID=AF,Number=A,Type=Float,Description="Allele fractions for alt alleles in the order listed">
##FORMAT=<ID=DP,Number=1,Type=Integer,Description="Approximate read depth (reads with MQ=255 or with bad mates are filtered)">
##FORMAT=<ID=F1R2,Number=R,Type=Integer,Description="Count of reads in F1R2 pair orientation supporting each allele">
##FORMAT=<ID=F2R1,Number=R,Type=Integer,Description="Count of reads in F2R1 pair orientation supporting each allele">
##FORMAT=<ID=GP,Number=G,Type=Float,Description="Phred-scaled posterior probabilities for genotypes as defined in the VCF specification">
##FORMAT=<ID=GQ,Number=1,Type=Integer,Description="Genotype Quality">
##FORMAT=<ID=GT,Number=1,Type=String,Description="Genotype">
##FORMAT=<ID=MB,Number=4,Type=Integer,Description="Per-sample component statistics to detect mate bias">
##FORMAT=<ID=PL,Number=G,Type=Integer,Description="Normalized, Phred-scaled likelihoods for genotypes as defined in the VCF specification">
##FORMAT=<ID=PRI,Number=G,Type=Float,Description="Phred-scaled prior probabilities for genotypes">
##FORMAT=<ID=PS,Number=1,Type=Integer,Description="Physical phasing ID information, where each unique ID within a given sample (but not across samples) connects records within a phasing group">
##FORMAT=<ID=SB,Number=4,Type=Integer,Description="Per-sample component statistics which comprise the Fisher's Exact Test to detect strand bias">
##DRAGENCommandLine=<ID=HashTableBuild,Version="SW: 01.003.044.3.8.4, HashTableVersion: 8",CommandLineOptions="/opt/edico/bin/dragen --lic-instance-id-location /root/.edico --build-hash-table true --ht-reference /data/input/appresults/156901751/Ref_Zm Cp_KF241981.fasta --ht-alt-aware-validate true --output-directory /data/scratch/Ref_Zm_Cp_KF241981">
##DRAGENCommandLine=<ID=dragen,Version="SW: 05.021.602.3.8.4, HW: 05.021.602",Date="Wed Jun 23 18:05:12 UTC 2021",CommandLineOptions="--lic-server https://XXXXXXXXXXXX:YYYYYYYYYYYYYYYYYYYYYYYYYYYYYYYY@license.edicogenome.com --lic-instance-id-location /root/.edico --output_status_file /data/scratch/progress.log --enable-duplicate-marking true --enable-map-align true --enable-map-align-output true…
##INFO=<ID=AC,Number=A,Type=Integer,Description="Allele count in genotypes, for each ALT allele, in the same order as listed">
##INFO=<ID=AF,Number=A,Type=Float,Description="Allele Frequency, for each ALT allele, in the same order as listed">
##INFO=<ID=AN,Number=1,Type=Integer,Description="Total number of alleles in called genotypes">
##INFO=<ID=DB,Number=0,Type=Flag,Description="dbSNP Membership">
##INFO=<ID=DP,Number=1,Type=Integer,Description="Approximate read depth (informative and non-informative); some reads may have been filtered based on mapq etc.">
##INFO=<ID=END,Number=1,Type=Integer,Description="Stop position of the interval">
##INFO=<ID=FS,Number=1,Type=Float,Description="Phred-scaled p-value using Fisher's exact test to detect strand bias">
##INFO=<ID=FractionInformativeReads,Number=1,Type=Float,Description="The fraction of informative reads out of the total reads">
##INFO=<ID=MQ,Number=1,Type=Float,Description="RMS Mapping Quality">
##INFO=<ID=MQRankSum,Number=1,Type=Float,Description="Z-score From Wilcoxon rank sum test of Alt vs. Ref read mapping qualities">
##INFO=<ID=QD,Number=1,Type=Float,Description="Variant Confidence/Quality by Depth">
##INFO=<ID=R2_5P_bias,Number=1,Type=Float,Description="Score based on mate bias and distance from 5 prime end">
##INFO=<ID=ReadPosRankSum,Number=1,Type=Float,Description="Z-score from Wilcoxon rank sum test of Alt vs. Ref read position bias">
##INFO=<ID=SOR,Number=1,Type=Float,Description="Symmetric Odds Ratio of 2x2 contingency table to detect strand bias">
##FILTER=<ID=DRAGENSnpHardQUAL,Description="Set if true:QUAL < 10.41">
##FILTER=<ID=DRAGENIndelHardQUAL,Description="Set if true:QUAL < 7.83">
##FILTER=<ID=LowDepth,Description="Set if true:DP <= 1">
##FILTER=<ID=LowGQ,Description="Set if true:GQ = 0">
##FILTER=<ID=PloidyConflict,Description="Genotype call from variant caller not consistent with chromosome ploidy">
##FILTER=<ID=RMxNRepeatRegion,Description="Site filtered because all or part of the variant allele is a repeat of the reference">
##contig=<ID=ENA|KF241981|KF241981.1,length=140447>
##reference=file:///data/scratch/Ref_Zm_Cp_KF241981.v8/254780843/reference.bin
#CHROM	POS	ID	REF	ALT	QUAL	FILTER	INFO	FORMAT	302339
ENA|KF241981|KF241981.1	3242	.	GC	G	432.42	PASS	AC=2;AF=1.000;AN=2;DP=141;FS=0.000;MQ=244.52;QD=3.07;SOR=1.224;FractionInformativeReads=0.908	GT:AD:AF:DP:F1R2:F2R1:GQ:PL:GP:PRI:SB:MB	1/1:0,128:1.000:128:0,63:0,65:382:473,385,0:4.3241e+02,3.8242e+02,0.0000e+00:0.00,38.00,41.00:0,0,50,78:0,0,65,63
ENA|KF241981|KF241981.1	3754	.	T	TAA	370.23	PASS	AC=2;AF=1.000;AN=2;DP=126;FS=0.000;MQ=249.97;QD=2.94;SOR=1.098;FractionInformativeReads=0.865	GT:AD:AF:DP:F1R2:F2R1:GQ:PL:GP:PRI:SB:MB	1/1:0,109:1.000:109:0,53:0,56:320:380,323,0:3.7023e+02,3.2023e+02,0.0000e+00:0.00,7.00,10.00:0,0,45,64:0,0,61,48
ENA|KF241981|KF241981.1	12961	.	A	ATTTTTT,ATTTTTTT	429.53	PASS	AC=1,1;AF=0.500,0.500;AN=2;DP=132;FS=0.000;MQ=243.65;MQRankSum=1.998;QD=3.25;ReadPosRankSum=-0.847;SOR=2.071;FractionInformativeReads=0.826;R2_5P_bias=0.000	GT:AD:AF:DP:F1R2:F2R1:GQ:PL:GP:PRI:SB:MB	1/2:2,72,35:0.661,0.321:109:2,32,15:0,40,20:44:444,387,50,507,0,54:4.2950e+02,3.7953e+02,4.5812e+01,4.5000e+02,1.5739e-04,5.0000e+01:0.00,7.00,10.01,7.00,14.00,10.01:1,1,29,78:1,1,59,48
ENA|KF241981|KF241981.1	51810	.	C	CT	34.81	PASS	AC=1;AF=0.500;AN=2;DP=136;FS=0.000;MQ=247.48;MQRankSum=7.792;QD=0.26;ReadPosRankSum=0.899;SOR=0.703;FractionInformativeReads=0.853;R2_5P_bias=49.758	GT:AD:AF:DP:F1R2:F2R1:GQ:PL:GP:PRI:SB:MB	0/1:84,32:0.276:116:43,18:41,14:35:40,0,50:3.4810e+01,1.4568e-03,5.3001e+01:0.00,5.00,8.00:27,57,10,22:40,44,10,22
ENA|KF241981|KF241981.1	126639	.	C	G	10.23	DRAGENSnpHardQUAL;LowDepth	AC=2;AF=1.000;AN=2;DP=1;FS=0.000;MQ=14.00;QD=10.23;SOR=1.609;FractionInformativeReads=1.000	GT:AD:AF:DP:F1R2:F2R1:GQ:PL:GP:PRI:SB:MB	1/1:0,1:1.000:1:0,0:0,1:3:45,3,0:1.0231e+01,3.4480e+00,3.4379e+00:0.00,34.77,37.77:0,0,0,1:0,0,1,0
